# Supplementary material for: Parkinson’s disease determinants, prediction and gene–environment interactions in the UK Biobank
Source: PubMed Central journal article supplement (PMC7509524; doi:10.1136/jnnp-2020-323646), 2020-09-14
Supplement: jnnp-2020-323646supp001.pdf [file jnnp-2020-323646supp001.pdf]

Supplementary table 1: definition of exposure variables.

| Exposure                   | UK Biobank Field ID                                | UK Biobank Description                    | ICD 10 code                                                                                                                                       |
|----------------------------|----------------------------------------------------|-------------------------------------------|---------------------------------------------------------------------------------------------------------------------------------------------------|
| Age                        | 21022                                              | Age at recruitment                        | N/a                                                                                                                                               |
| Sex                        | 31                                                 | Sex                                       | N/a                                                                                                                                               |
| Education                  | 845                                                | Age completed full time education         | N/a                                                                                                                                               |
| Townsend deprivation index | 189                                                | Townsend deprivation index at recruitment | N/a                                                                                                                                               |
| Ethnicity                  | 21000                                              | Ethnic background                         | N/a                                                                                                                                               |
| Country of birth           | 1647                                               | Country of birth (UK/elsewhere)           | N/a                                                                                                                                               |
| Parkinson's disease        | HES coding, Non-cancer illness code, self-reported | N/a                                       | G20                                                                                                                                               |
| Constipation               | HES coding, Non-cancer illness code, self-reported | N/a                                       | K59.0                                                                                                                                             |
| Depression                 | HES coding, Non-cancer illness code, self-reported | N/a                                       | F32.0, F32.1, F32.2, F32.3, F32.8, F32.9, F33.0, F33.1, F33.2, F33.3, F33.4, F33.8, F33.9                                                         |
| Anxiety                    | HES coding, Non-cancer illness code, self-reported | N/a                                       | F41.2, F41.3, F41.8, F41.9                                                                                                                        |
| Hypertension               | HES coding, Non-cancer illness code, self-reported | N/a                                       | I10                                                                                                                                               |
| Diabetes                   | HES coding, Non-cancer illness code, self-reported | N/a                                       | E10.0, E10.1, E10.2, E10.3, E10.4, E10.5, E10.6, E10.7, E10.8, E10.9, E11.0, E11.1, E11.2, E11.3, E11.4, E11.5, E11.6, E11.7, E11.8, E11.9, E12.0 |
| Gastric ulcer              | HES coding, Non-cancer illness code, self-reported | N/a                                       | K25.0, K25.1, K25.2, K25.3, K25.4, K25.5, K25.6, K25.7, K25.9                                                                                     |
| Migraine                   | HES coding, Non-cancer illness code, self-reported | N/a                                       | G43.0, G43.1                                                                                                                                      |

|                                                |                                                             |                                                                       |                                                                                                                                             |
|------------------------------------------------|-------------------------------------------------------------|-----------------------------------------------------------------------|---------------------------------------------------------------------------------------------------------------------------------------------|
| <b>Shoulder stiffness</b>                      | HES coding,<br>Non-cancer<br>illness code,<br>self-reported | N/a                                                                   | M25.61                                                                                                                                      |
| <b>Shoulder pain</b>                           | HES coding,<br>Non-cancer<br>illness code,<br>self-reported | N/a                                                                   | M25.51                                                                                                                                      |
| <b>Hyposmia</b>                                | HES coding,<br>Non-cancer<br>illness code,<br>self-reported | N/a                                                                   | R43.0                                                                                                                                       |
| <b>Erectile<br/>dysfunction</b>                | HES coding,<br>Non-cancer<br>illness code,<br>self-reported | N/a                                                                   | N48.4                                                                                                                                       |
| <b>Head injury</b>                             | HES coding,<br>Non-cancer<br>illness code,<br>self-reported | N/a                                                                   | S02.0, S02.1, S02.2,<br>S02.3, S02.4, S02.6,<br>S02.7, S02.8, S02.9,<br>S06.0, S06.1, S06.2,<br>S06.3, S06.4, S06.5,<br>S06.6, S06.8, S06.9 |
| <b>Family history:<br/>Parkinson's disease</b> | 20107, 20110,<br>20111                                      | Illnesses of father,<br>Illnesses of mother,<br>Illnesses of siblings | N/a                                                                                                                                         |
| <b>Family history:<br/>Depression</b>          | 20107, 20110,<br>20111                                      | Illnesses of father,<br>Illnesses of mother,<br>Illnesses of siblings | N/a                                                                                                                                         |
| <b>Family History:<br/>Dementia</b>            | 20107, 20110,<br>20111                                      | Illnesses of father,<br>Illnesses of mother,<br>Illnesses of siblings | N/a                                                                                                                                         |
| <b>Family History:<br/>Stroke</b>              | 20107, 20110,<br>20111                                      | Illnesses of father,<br>Illnesses of mother,<br>Illnesses of siblings | N/a                                                                                                                                         |
| <b>Family History:<br/>Diabetes</b>            | 20107, 20110,<br>20111                                      | Illnesses of father,<br>Illnesses of mother,<br>Illnesses of siblings | N/a                                                                                                                                         |
| <b>Smoking status</b>                          | 20116                                                       | Smoking status                                                        | N/a                                                                                                                                         |
| <b>Cups of coffee per<br/>day</b>              | 1498                                                        | Coffee intake                                                         | N/a                                                                                                                                         |
| <b>Alcohol</b>                                 | 1558                                                        | Alcohol intake<br>frequency                                           | N/a                                                                                                                                         |
| <b>Body mass index</b>                         | 21001                                                       | Body mass index                                                       | N/a                                                                                                                                         |
| <b>Daytime sleepiness</b>                      | 1220                                                        | Daytime dozing /<br>sleeping (narcolepsy)                             | N/a                                                                                                                                         |
| <b>Pesticides</b>                              | 22614                                                       | Worked with<br>pesticides                                             | N/a                                                                                                                                         |
| <b>Breast fed</b>                              | 1677                                                        | Breast fed as a baby                                                  | N/a                                                                                                                                         |

|                              |      |                                     |     |
|------------------------------|------|-------------------------------------|-----|
| <b>Childhood obesity</b>     | 1687 | Comparative body size at age 10     | N/a |
| <b>Handedness</b>            | 1707 | Handedness (chirality/laterality)   | N/a |
| <b>Maternal smoking</b>      | 1787 | Maternal smoking around birth       | N/a |
| <b>Age of menarche</b>       | 2714 | Age when periods started (menarche) | N/a |
| <b>Age of voice breaking</b> | 2385 | Relative age voice broke            | N/a |

**Supplementary table 2: demographics of PD cases and controls. Continuous variables are depicted as mean (SD). Categorical variables are depicted as n (%). Univariate comparisons reflect chi-squared tests for categorical variables and unpaired two-sample t tests for continuous variables.**

| <b>Prevalent cases</b>                   |                   |                 |                |
|------------------------------------------|-------------------|-----------------|----------------|
| <b>Trait</b>                             | <b>Control</b>    | <b>Cases</b>    | <b>P value</b> |
| <b>Age</b>                               | 56.5 (8.09)       | 62.74 (5.49)    | <2E-16         |
| <b>Age completed full-time education</b> | 16.74 (4.81)      | 16.43 (2.44)    | 1.75E-06       |
| <b>Townsend deprivation index</b>        | -1.29 (3.1)       | -1.45 (3.07)    | 0.019181457    |
| <b>Sex</b>                               |                   |                 | 1.10E-49       |
| Female                                   | 272578 ( 54.47 %) | 817 ( 38.41 %)  |                |
| Male                                     | 227819 ( 45.53 %) | 1310 ( 61.59 %) |                |
| <b>Ethnicity</b>                         |                   |                 | 6.84E-05       |
| White                                    | 470670 ( 94.6 %)  | 2039 ( 96.59 %) |                |
| Non-white                                | 26841 ( 5.4 %)    | 72 ( 3.41 %)    |                |
| <b>Country of birth</b>                  |                   |                 | 2.94E-04       |
| UK                                       | 458838 ( 92.02 %) | 1991 ( 94.18 %) |                |
| Non-UK                                   | 39788 ( 7.98 %)   | 123 ( 5.82 %)   |                |
|                                          |                   |                 |                |
| <b>Incident cases</b>                    |                   |                 |                |
| <b>Trait</b>                             | <b>Control</b>    | <b>Cases</b>    | <b>P value</b> |
| <b>Age</b>                               | 56.5 (8.09)       | 63.09 (5.47)    | 5.95E-251      |
| <b>Age completed full-time education</b> | 16.74 (4.81)      | 16.36 (2.31)    | 1.41E-06       |
| <b>Townsend deprivation index</b>        | -1.29 (3.1)       | -1.28 (3.14)    | 0.84498473     |
| <b>Sex</b>                               |                   |                 | 4.30E-31       |
| Female                                   | 272578 ( 54.47 %) | 488 ( 38.24 %)  |                |
| Male                                     | 227819 ( 45.53 %) | 788 ( 61.76 %)  |                |
| <b>Ethnicity</b>                         |                   |                 | 0.003093495    |
| White                                    | 470670 ( 94.6 %)  | 1222 ( 96.52 %) |                |
| Non-white                                | 26841 ( 5.4 %)    | 44 ( 3.48 %)    |                |
| <b>Country of birth</b>                  |                   |                 | 0.003124537    |
| UK                                       | 458838 ( 92.02 %) | 1194 ( 94.31 %) |                |
| Non-UK                                   | 39788 ( 7.98 %)   | 72 ( 5.69 %)    |                |

**Supplementary table 3: SNPs included in the ‘best’ PRS, as determined by highest pseudo-R<sup>2</sup> in the training set. Annotations are given in hg38 and nearest genes are derived from Ensembl Variant Event Predictor.**

| RSID        | CHR:BP (hg38)         | Nearest gene |
|-------------|-----------------------|--------------|
| rs845250    | 1:7423291-7423291     | CAMTA1       |
| rs77901899  | 1:62271453-62271453   | KANK4        |
| rs148303184 | 1:62567432-62567432   | DOCK7        |
| rs4655643   | 1:66624416-66624416   | SGIP1        |
| rs11208947  | 1:66689781-66689781   | SGIP1        |
| rs278839    | 1:77642189-77642189   | AC118549.1   |
| rs11164880  | 1:93192539-93192539   | CCDC18       |
| rs114809584 | 1:96889283-96889283   | -            |
| rs9728526   | 1:145718303-145718303 | CD160        |
| rs74916032  | 1:147535311-147535311 | -            |
| rs201694776 | 1:152616206-152616206 | LCE3B        |
| rs12738393  | 1:154245167-154245167 | UBAP2L       |
| rs34450945  | 1:154316872-154316872 | AQP10        |
| rs114853077 | 1:154880259-154880259 | -            |
| rs11264304  | 1:155060841-155060841 | ADAM15       |
| rs12743272  | 1:155060858-155060858 | ADAM15       |
| rs35749011  | 1:155162560-155162560 | -            |
| rs12748814  | 1:155340652-155340652 | ASH1L        |
| rs71628684  | 1:155715686-155715686 | DAP3         |
| rs35603727  | 1:156038197-156038197 | UBQLN4       |
| rs10737170  | 1:156094089-156094089 | LMNA         |
| rs2853643   | 1:156215040-156215040 | PMF1-BGLAP   |
| rs12748659  | 1:156330207-156330207 | CCT3         |
| rs4326638   | 1:161419170-161419170 | AL592295.4   |
| rs61802091  | 1:161419856-161419856 | AL592295.4   |
| rs114797774 | 1:161498640-161498640 | -            |
| rs4657041   | 1:161509069-161509069 | FCGR2A       |
| rs11810143  | 1:161510859-161510859 | FCGR2A       |
| rs79277331  | 1:161537099-161537099 | FCGR3A       |
| rs144055958 | 1:161563618-161563618 | AL590385.2   |
| rs17411858  | 1:161647726-161647726 | -            |
| rs235487    | 1:171562020-171562020 | PRRC2C       |
| rs76357776  | 1:171674923-171674923 | PFN1P1       |
| rs10913559  | 1:171732347-171732347 | VAMP4        |
| rs10913622  | 1:171760535-171760535 | Z98751.2     |
| rs57476157  | 1:171803313-171803313 | AL031864.1   |
| rs12141455  | 1:193352957-193352957 | LINC01031    |
| rs55922528  | 1:194585600-194585600 | -            |
| rs78203442  | 1:194766300-194766300 | -            |
| rs116592662 | 1:194863221-194863221 | AL353072.2   |
| rs4915470   | 1:200965282-200965282 | KIF21B       |
| rs296562    | 1:200976146-200976146 | KIF21B       |

|             |                        |            |
|-------------|------------------------|------------|
| rs61819408  | 1:204794161-204794161  | -          |
| rs12078075  | 1:205194670-205194670  | DSTYK      |
| rs141969842 | 1:205674792-205674792  | SLC45A3    |
| rs4245718   | 1:205683344-205683344  | SLC45A3    |
| rs7545345   | 1:205721813-205721813  | NUCKS1     |
| rs11240565  | 1:205753830-205753830  | NUCKS1     |
| rs141145750 | 1:205756888-205756888  | -          |
| rs73080374  | 1:205783562-205783562  | AC119673.2 |
| rs12740609  | 1:205787407-205787407  | SLC41A1    |
| rs114984342 | 1:205839745-205839745  | PM20D1     |
| rs77133845  | 1:226694124-226694124  | ITPKB      |
| rs4653767   | 1:226728377-226728377  | ITPKB      |
| rs149905768 | 1:226786527-226786527  | RPS27P5    |
| rs61835654  | 1:226795629-226795629  | -          |
| rs12075077  | 1:226911075-226911075  | COQ8A      |
| rs55925257  | 1:227871638-227871638  | -          |
| rs147393995 | 1:228039106-228039106  | WNT3A      |
| rs34249947  | 1:228136466-228136466  | GUK1       |
| rs7523171   | 1:232460383-232460383  | SIPA1L2    |
| rs6672473   | 1:232507091-232507091  | SIPA1L2    |
| rs10797576  | 1:232528865-232528865  | SIPA1L2    |
| rs943140    | 1:232539286-232539286  | SIPA1L2    |
| rs9428576   | 1:243498725-243498725  | AKT3       |
| rs12408455  | 1:243578639-243578639  | AKT3       |
| rs17369299  | 10:15479880-15479880   | -          |
| rs76761646  | 10:15485089-15485089   | -          |
| rs7077871   | 10:15496004-15496004   | -          |
| rs10906914  | 10:15507613-15507613   | -          |
| rs79305906  | 10:22679230-22679230   | PIP4K2A    |
| rs2754493   | 10:38362521-38362521   | HSD17B7P2  |
| rs2489678   | 10:42458987-42458987   | CCNYL2     |
| rs11239219  | 10:44720664-44720664   | -          |
| rs10857613  | 10:48621632-48621632   | ARHGAP22   |
| rs17721694  | 10:50407533-50407533   | SGMS1      |
| rs72809473  | 10:75695702-75695702   | LRMDA      |
| rs846578    | 10:76739750-76739750   | -          |
| rs111691636 | 10:77615783-77615783   | KCNMA1     |
| rs3781273   | 10:93643216-93643216   | PDE6C      |
| rs142328600 | 10:94008085-94008085   | -          |
| rs10882978  | 10:97663991-97663991   | PI4K2A     |
| rs3740484   | 10:100987606-100987606 | SEMA4G     |
| rs118165209 | 10:101999888-101999888 | ARMH3      |
| rs67497633  | 10:102055738-102055738 | ARMH3      |
| rs117507580 | 10:102182118-102182118 | -          |
| rs10748818  | 10:102255522-102255522 | GBF1       |
| rs79931565  | 10:102415892-102415892 | PSD        |

|             |                        |            |
|-------------|------------------------|------------|
| rs117542248 | 10:117751683-117751683 | LINC02674  |
| rs142479119 | 10:119419271-119419271 | GRK5       |
| rs4752331   | 10:119564464-119564464 | AC012468.1 |
| rs11592336  | 10:119611822-119611822 | -          |
| rs188789342 | 10:119612816-119612816 | -          |
| rs2577339   | 10:119662970-119662970 | BAG3       |
| rs196325    | 10:119669316-119669316 | BAG3       |
| rs3858339   | 10:119676556-119676556 | BAG3       |
| rs72842211  | 10:119678699-119678699 | BAG3       |
| rs932269    | 10:119680164-119680164 | BAG3       |
| rs113770268 | 10:119695890-119695890 | -          |
| rs4751750   | 10:119720871-119720871 | -          |
| rs117896735 | 10:119776815-119776815 | INPP5F     |
| rs61870572  | 10:119887396-119887396 | MCMBP      |
| rs12241478  | 10:119907508-119907508 | SEC23IP    |
| rs1052289   | 10:119940743-119940743 | SEC23IP    |
| rs117997675 | 10:119995603-119995603 | NACAP2     |
| rs72828546  | 10:120083083-120083083 | -          |
| rs3117448   | 10:132351935-132351935 | LRRC27     |
| rs117011293 | 11:527311-527311       | HRAS       |
| rs4963136   | 11:549119-549119       | LRRC56     |
| rs10835060  | 11:1466913-1466913     | BRSK2      |
| rs10840502  | 11:2179719-2179719     | -          |
| rs7933395   | 11:7508194-7508194     | OLFML1     |
| rs112980556 | 11:10518378-10518378   | RNF141     |
| rs11042871  | 11:10531204-10531204   | RNF141     |
| rs118170201 | 11:10559890-10559890   | LYVE1      |
| rs117479720 | 11:10573528-10573528   | LYVE1      |
| rs117735090 | 11:16316761-16316761   | SOX6       |
| rs71486884  | 11:18867847-18867847   | MRGPRX7P   |
| rs71486893  | 11:19050438-19050438   | MRGPRX2    |
| rs11038679  | 11:45837836-45837836   | -          |
| rs139014611 | 11:47368136-47368136   | SPI1       |
| rs3911022   | 11:58019480-58019480   | OR9Q1      |
| rs66573492  | 11:58416324-58416324   | OR5B2      |
| rs1938602   | 11:58648003-58648003   | GLYAT      |
| rs17494956  | 11:66224968-66224968   | PACS1      |
| rs12283611  | 11:83776234-83776234   | DLG2       |
| rs12290852  | 11:83776846-83776846   | DLG2       |
| rs74527019  | 11:97638101-97638101   | -          |
| rs2509049   | 11:119095811-119095811 | DPAGT1     |
| rs7104278   | 11:129386409-129386409 | BARX2      |
| rs7111235   | 11:133788766-133788766 | LINC02743  |
| rs10791323  | 11:133832755-133832755 | -          |
| rs73028346  | 11:133853489-133853489 | -          |
| rs10750547  | 11:133859354-133859354 | -          |

|             |                        |            |
|-------------|------------------------|------------|
| rs4937849   | 11:133887896-133887896 | -          |
| rs329652    | 11:133899804-133899804 | IGSF9B     |
| rs12800905  | 11:133919097-133919097 | IGSF9B     |
| rs11223625  | 11:133926781-133926781 | IGSF9B     |
| rs1793680   | 11:133928867-133928867 | IGSF9B     |
| rs11223627  | 11:133930874-133930874 | IGSF9B     |
| rs55880610  | 11:133977448-133977448 | -          |
| rs4936216   | 11:133983113-133983113 | -          |
| rs12273396  | 11:133986148-133986148 | -          |
| rs148287061 | 12:21588466-21588466   | GYS2       |
| rs11047823  | 12:25090336-25090336   | LRMP       |
| rs10843831  | 12:30742317-30742317   | CAPRIN2    |
| rs77669894  | 12:32089513-32089513   | -          |
| rs189221759 | 12:32300735-32300735   | BICD1      |
| rs140427697 | 12:32338739-32338739   | BICD1      |
| rs146492306 | 12:33108774-33108774   | -          |
| rs117154291 | 12:33403716-33403716   | SYT10      |
| rs190651674 | 12:34044984-34044984   | AC046130.2 |
| rs115468831 | 12:39617722-39617722   | ABCD2      |
| rs10784274  | 12:39909035-39909035   | SLC2A13    |
| rs7970063   | 12:39920244-39920244   | SLC2A13    |
| rs1497046   | 12:39928174-39928174   | SLC2A13    |
| rs12423983  | 12:39947809-39947809   | SLC2A13    |
| rs7962710   | 12:39970300-39970300   | SLC2A13    |
| rs12824918  | 12:39984971-39984971   | SLC2A13    |
| rs530602    | 12:39986233-39986233   | SLC2A13    |
| rs555740    | 12:39988897-39988897   | SLC2A13    |
| rs140722239 | 12:39994307-39994307   | SLC2A13    |
| rs17442108  | 12:40036632-40036632   | SLC2A13    |
| rs17442143  | 12:40044167-40044167   | SLC2A13    |
| rs1813122   | 12:40100944-40100944   | SLC2A13    |
| rs17458501  | 12:40102868-40102868   | SLC2A13    |
| rs79179868  | 12:40164911-40164911   | LINC02471  |
| rs2404577   | 12:40183917-40183917   | LRRK2-DT   |
| rs11175546  | 12:40194013-40194013   | LRRK2-DT   |
| rs2046931   | 12:40195305-40195305   | LRRK2-DT   |
| rs79410089  | 12:40198262-40198262   | LRRK2-DT   |
| rs7970326   | 12:40214089-40214089   | LRRK2-DT   |
| rs76904798  | 12:40220632-40220632   | LRRK2      |
| rs1388598   | 12:40222364-40222364   | LRRK2      |
| rs17465751  | 12:40227079-40227079   | LRRK2      |
| rs4293189   | 12:40263423-40263423   | LRRK2      |
| rs111341533 | 12:40266936-40266936   | LRRK2      |
| rs17466339  | 12:40318557-40318557   | LRRK2      |
| rs11564147  | 12:40345691-40345691   | LRRK2      |
| rs11176261  | 12:40372450-40372450   | LRRK2      |



|             |                        |            |
|-------------|------------------------|------------|
| rs1019709   | 12:40408348-40408348   | MUC19      |
| rs2052802   | 12:40430937-40430937   | MUC19      |
| rs117774158 | 12:40432881-40432881   | MUC19      |
| rs11564228  | 12:40443529-40443529   | MUC19      |
| rs17128233  | 12:40458733-40458733   | MUC19      |
| rs11177373  | 12:40595381-40595381   | -          |
| rs7960771   | 12:40607270-40607270   | -          |
| rs144296031 | 12:40608183-40608183   | -          |
| rs7134773   | 12:40648982-40648982   | -          |
| rs66951529  | 12:40777688-40777688   | CNTN1      |
| rs1838343   | 12:40802428-40802428   | CNTN1      |
| rs10879497  | 12:40998221-40998221   | CNTN1      |
| rs144029582 | 12:41754811-41754811   | -          |
| rs146006335 | 12:42925453-42925453   | AC068802.1 |
| rs2131709   | 12:44500625-44500625   | AC025253.1 |
| rs10880855  | 12:45751072-45751072   | ARID2      |
| rs1896539   | 12:46009539-46009539   | AC084878.1 |
| rs2408459   | 12:46047757-46047757   | -          |
| rs10876470  | 12:53629707-53629707   | ATF7       |
| rs71465151  | 12:62379067-62379067   | USP15      |
| rs17661390  | 12:62452666-62452666   | -          |
| rs118024659 | 12:63868716-63868716   | SRGAP1     |
| rs10777819  | 12:96903139-96903139   | NEDD1      |
| rs73168309  | 12:101806240-101806240 | GNPTAB     |
| rs17032033  | 12:101893012-101893012 | DRAM1      |
| rs140811937 | 12:101925840-101925840 | DRAM1      |
| rs17038460  | 12:106454636-106454636 | POLR3B     |
| rs4964178   | 12:106532721-106532721 | AC079385.1 |
| rs11113811  | 12:108315135-108315135 | CMKLR1     |
| rs10850060  | 12:109345885-109345885 | MYO1H      |
| rs10774803  | 12:109620415-109620415 | -          |
| rs6489158   | 12:122625818-122625818 | KNTC1      |
| rs34773022  | 12:122638867-122638867 | AC026333.4 |
| rs76554679  | 12:122655006-122655006 | -          |
| rs9788287   | 12:122670716-122670716 | -          |
| rs7313367   | 12:122727689-122727689 | HCAR1      |
| rs11059650  | 12:122735238-122735238 | HCAR1      |
| rs2245611   | 12:122738783-122738783 | -          |
| rs193140864 | 12:122807291-122807291 | CCDC62     |
| rs12817488  | 12:122811747-122811747 | CCDC62     |
| rs11060344  | 12:122844554-122844554 | HIP1R      |
| rs112484459 | 12:123003852-123003852 | PITPNM2    |
| rs185284989 | 12:123255582-123255582 | C12orf65   |
| rs28659953  | 12:123427666-123427666 | RILPL2     |
| rs113962677 | 12:130435916-130435916 | RIMBP2     |
| rs4418881   | 12:132481480-132481480 | -          |

|             |                        |            |
|-------------|------------------------|------------|
| rs12811407  | 12:132493112-132493112 | FBRSL1     |
| rs10781619  | 12:132561748-132561748 | FBRSL1     |
| rs9507040   | 13:23166769-23166769   | LINC00362  |
| rs4769830   | 13:30402601-30402601   | AL161893.1 |
| rs9544930   | 13:35662291-35662291   | NBEA       |
| rs9575700   | 13:36263862-36263862   | CCDC169    |
| rs1198502   | 13:49344829-49344829   | CAB39L     |
| rs9535211   | 13:49365767-49365767   | CAB39L     |
| rs9535230   | 13:49406382-49406382   | CAB39L     |
| rs1127021   | 13:49721979-49721979   | KPNA3      |
| rs9584473   | 13:97034030-97034030   | -          |
| rs7324681   | 13:97111528-97111528   | -          |
| rs4771268   | 13:97212767-97212767   | -          |
| rs6491345   | 13:97263104-97263104   | MBNL2      |
| rs2389911   | 13:97487423-97487423   | -          |
| rs1805097   | 13:109782884-109782884 | IRS2       |
| rs9515121   | 13:109786818-109786818 | IRS2       |
| rs117146448 | 13:111206492-111206492 | ARHGEF7    |
| rs3858827   | 13:111242333-111242333 | ARHGEF7    |
| rs11625412  | 14:21417638-21417638   | CHD8       |
| rs61988340  | 14:37280387-37280387   | MIPOL1     |
| rs10133391  | 14:37536636-37536636   | MIPOL1     |
| rs10144632  | 14:54775618-54775618   | SAMD4A     |
| rs709939    | 14:54782627-54782627   | SAMD4A     |
| rs9323272   | 14:54822206-54822206   | -          |
| rs55985131  | 14:54823301-54823301   | -          |
| rs72715546  | 14:54918780-54918780   | -          |
| rs72715548  | 14:54923307-54923307   | -          |
| rs56206440  | 14:54984168-54984168   | WDHD1      |
| rs74617736  | 14:55154201-55154201   | DLGAP5     |
| rs6573020   | 14:55404734-55404734   | ATG14      |
| rs946065    | 14:55466201-55466201   | -          |
| rs12880964  | 14:55495177-55495177   | KTN1-AS1   |
| rs1188074   | 14:55505113-55505113   | KTN1-AS1   |
| rs8010372   | 14:55551927-55551927   | KTN1-AS1   |
| rs12434554  | 14:55707387-55707387   | -          |
| rs1959088   | 14:55731160-55731160   | -          |
| rs1954483   | 14:62066382-62066382   | AL390816.1 |
| rs2681735   | 14:72345817-72345817   | RGS6       |
| rs888418    | 14:74652593-74652593   | AREL1      |
| rs2193597   | 14:74767626-74767626   | YLPM1      |
| rs917833    | 14:74912450-74912450   | RPS6KL1    |
| rs119512    | 14:87923196-87923196   | GALC       |
| rs406280    | 14:87927161-87927161   | GALC       |
| rs8005172   | 14:88006268-88006268   | GPR65      |
| rs8019631   | 14:88054358-88054358   | LINC01146  |

|             |                        |            |
|-------------|------------------------|------------|
| rs4900456   | 14:100145843-100145843 | DEGS2      |
| rs8008884   | 14:100187450-100187450 | -          |
| rs118122626 | 14:100735293-100735293 | DLK1       |
| rs142070567 | 15:29469344-29469344   | FAM189A1   |
| rs10851405  | 15:41516888-41516888   | LTK        |
| rs11635790  | 15:41588265-41588265   | TYRO3      |
| rs117618307 | 15:41738651-41738651   | MGA        |
| rs117549128 | 15:48705628-48705628   | -          |
| rs3098172   | 15:50480355-50480355   | USP8       |
| rs9635336   | 15:50506819-50506819   | USP8       |
| rs2250980   | 15:61704782-61704782   | AC018618.1 |
| rs11854497  | 15:61749234-61749234   | -          |
| rs11071726  | 15:63098423-63098423   | AC087612.1 |
| rs116887089 | 15:97959417-97959417   | ARRDC4     |
| rs61747226  | 15:97969201-97969201   | ARRDC4     |
| rs1491184   | 15:97993366-97993366   | AC024651.1 |
| rs28385404  | 15:98034365-98034365   | AC022523.1 |
| rs12919274  | 16:1490005-1490005     | TELO2      |
| rs238680    | 16:1822159-1822159     | FAHD1      |
| rs72766631  | 16:2001427-2001427     | ZNF598     |
| rs8051877   | 16:2012064-2012064     | ZNF598     |
| rs26828     | 16:2194530-2194530     | CASKIN1    |
| rs1875206   | 16:9965150-9965150     | GRIN2A     |
| rs12444013  | 16:11614990-11614990   | LITAF      |
| rs2352795   | 16:19254563-19254563   | SYT17      |
| rs4072402   | 16:28925938-28925938   | RABEP2     |
| rs35695082  | 16:30781068-30781068   | ZNF629     |
| rs9939286   | 16:31150982-31150982   | PRSS36     |
| rs1548914   | 16:50445460-50445460   | AC007493.1 |
| rs1861761   | 16:50811622-50811622   | LINC02168  |
| rs8051542   | 16:52500255-52500255   | TOX3       |
| rs4784227   | 16:52565276-52565276   | CASC16     |
| rs3104783   | 16:52602330-52602330   | CASC16     |
| rs8059703   | 16:52922474-52922474   | -          |
| rs10221156  | 16:52935514-52935514   | PHBP21     |
| rs8050560   | 16:52937867-52937867   | PHBP21     |
| rs74685800  | 16:52959266-52959266   | -          |
| rs77419902  | 16:52960811-52960811   | -          |
| rs11648976  | 16:53018339-53018339   | -          |
| rs3934986   | 16:81867991-81867991   | PLCG2      |
| rs3102347   | 16:89303461-89303461   | ANKRD11    |
| rs4785677   | 16:89488693-89488693   | ANKRD11    |
| rs12600861  | 17:7452302-7452302     | CHRN1      |
| rs6503037   | 17:7534733-7534733     | AC016876.1 |
| rs62059800  | 17:7545256-7545256     | TNFSF12    |
| rs190937141 | 17:7867619-7867619     | NAA38      |

|             |                      |                     |
|-------------|----------------------|---------------------|
| rs12950912  | 17:7942329-7942329   | CNTROB              |
| rs2278635   | 17:8087597-8087597   | MIR4314             |
| rs55844265  | 17:16127463-16127463 | NCOR1               |
| rs2245737   | 17:18241406-18241406 | LLGL1               |
| rs62070807  | 17:29570113-29570113 | GIT1                |
| rs146420943 | 17:31597422-31597422 | AC007923.3          |
| rs56171152  | 17:38740498-38740498 | PCGF2               |
| rs8070757   | 17:42448301-42448301 | -                   |
| rs12951632  | 17:42588995-42588995 | RETREG3             |
| rs62078933  | 17:44155037-44155037 | HROB                |
| rs58392387  | 17:44220521-44220521 | UBTF                |
| rs62078946  | 17:44244380-44244380 | SLC4A1              |
| rs850713    | 17:44350364-44350364 | GRN                 |
| rs35941271  | 17:44358852-44358852 | FAM171A2            |
| rs5910      | 17:44372421-44372421 | ITGA2B              |
| rs113575323 | 17:44394009-44394009 | ITGA2B              |
| rs59601921  | 17:44423044-44423044 | GPATCH8             |
| rs4793119   | 17:44547036-44547036 | -                   |
| rs4792956   | 17:44795863-44795863 | GJC1                |
| rs17544947  | 17:44841598-44841598 | HIGD1B              |
| rs17629022  | 17:44914681-44914681 | GFAP                |
| rs11652522  | 17:44978211-44978211 | AC015936.2          |
| rs1053578   | 17:45143918-45143918 | ACBD4               |
| rs72832877  | 17:45201209-45201209 | AC008105.3          |
| rs721579    | 17:45293115-45293115 | MAP3K14             |
| rs17686238  | 17:45339907-45339907 | -                   |
| rs9303471   | 17:45378976-45378976 | -                   |
| rs9895436   | 17:45380520-45380520 | -                   |
| rs117311539 | 17:45384761-45384761 | -                   |
| rs8327      | 17:45395141-45395141 | ARHGAP27            |
| rs12939187  | 17:45430857-45430857 | ARHGAP27            |
| rs8075717   | 17:45456956-45456956 | PLEKHM1             |
| rs62065439  | 17:45482589-45482589 | PLEKHM1             |
| rs1635303   | 17:45633467-45633467 | LINC02210           |
| rs118084908 | 17:45645238-45645238 | LINC02210           |
| rs62053943  | 17:45666837-45666837 | LINC02210-<br>CRHR1 |
| rs143699161 | 17:45671346-45671346 | LINC02210-<br>CRHR1 |
| rs1635287   | 17:45686474-45686474 | LINC02210-<br>CRHR1 |
| rs1724425   | 17:45704381-45704381 | LINC02210-<br>CRHR1 |
| rs62056907  | 17:45705809-45705809 | LINC02210-<br>CRHR1 |
| rs1724386   | 17:45706394-45706394 | LINC02210-<br>CRHR1 |

|             |                      |                 |
|-------------|----------------------|-----------------|
| rs9912362   | 17:45706862-45706862 | LINC02210-CRHR1 |
| rs1880748   | 17:45711430-45711430 | LINC02210-CRHR1 |
| rs117615688 | 17:45720942-45720942 | LINC02210-CRHR1 |
| rs62054441  | 17:45751383-45751383 | LINC02210-CRHR1 |
| rs17335035  | 17:45752192-45752192 | LINC02210-CRHR1 |
| rs67492300  | 17:45760411-45760411 | LINC02210-CRHR1 |
| rs12940065  | 17:45788505-45788505 | CRHR1           |
| rs62057097  | 17:45795918-45795918 | CRHR1           |
| rs28364026  | 17:45834928-45834928 | CRHR1           |
| rs7221167   | 17:45855941-45855941 | MAPT-AS1        |
| rs2301689   | 17:45858472-45858472 | MAPT-AS1        |
| rs3785878   | 17:45896781-45896781 | MAPT            |
| rs4792893   | 17:45908357-45908357 | MAPT            |
| rs3785880   | 17:45916010-45916010 | MAPT            |
| rs35908989  | 17:45916655-45916655 | MAPT            |
| rs7210219   | 17:45941153-45941153 | MAPT            |
| rs242557    | 17:45942346-45942346 | MAPT            |
| rs3785885   | 17:45981274-45981274 | MAPT            |
| rs2435207   | 17:45981562-45981562 | MAPT            |
| rs713522    | 17:45987897-45987897 | MAPT            |
| rs60969130  | 17:46013413-46013413 | MAPT            |
| rs118185397 | 17:46063857-46063857 | KANSL1          |
| rs11652924  | 17:46104901-46104901 | KANSL1          |
| rs2668692   | 17:46215654-46215654 | AC217773.1      |
| rs35732828  | 17:46755851-46755851 | NSF             |
| rs1563304   | 17:46797087-46797087 | WNT3            |
| rs3851781   | 17:46813935-46813935 | WNT3            |
| rs8069437   | 17:46829583-46829583 | WNT3            |
| rs58287249  | 17:46846427-46846427 | WNT9B           |
| rs57986961  | 17:46870455-46870455 | WNT9B           |
| rs28605133  | 17:50735379-50735379 | LUC7L3          |
| rs8066773   | 17:58524191-58524191 | SEPTIN4         |
| rs117987711 | 17:59033908-59033908 | TRIM37          |
| rs61169879  | 17:61840005-61840005 | BRIP1           |
| rs2278813   | 17:61962634-61962634 | MED13           |
| rs6416935   | 17:62107553-62107553 | -               |
| rs59229385  | 17:62117416-62117416 | AC008158.1      |
| rs117639668 | 17:62144541-62144541 | POLRMTP1        |
| rs3088093   | 17:64129078-64129078 | ERN1            |
| rs7219674   | 17:78394116-78394116 | PGS1            |
| rs1623869   | 17:78429993-78429993 | DNAH17          |

|             |                      |            |
|-------------|----------------------|------------|
| rs72634334  | 17:82097050-82097050 | FASN       |
| rs2123311   | 18:6403286-6403286   | L3MBTL4    |
| rs7237528   | 18:33630168-33630168 | ASXL3      |
| rs78550341  | 18:33646891-33646891 | ASXL3      |
| rs10775455  | 18:33730797-33730797 | ASXL3      |
| rs17754023  | 18:33843083-33843083 | -          |
| rs16965005  | 18:33874080-33874080 | NOL4       |
| rs72963300  | 18:34437451-34437451 | -          |
| rs75251687  | 18:42946139-42946139 | RIT2       |
| rs117096853 | 18:43016306-43016306 | RIT2       |
| rs4890245   | 18:43019205-43019205 | RIT2       |
| rs4890426   | 18:43092453-43092453 | RIT2       |
| rs72910682  | 18:43093026-43093026 | RIT2       |
| rs12456492  | 18:43093415-43093415 | RIT2       |
| rs56384227  | 18:43111033-43111033 | RIT2       |
| rs7241603   | 18:43217696-43217696 | -          |
| rs7236839   | 18:43239306-43239306 | -          |
| rs1549316   | 18:43258288-43258288 | -          |
| rs111987322 | 18:47191759-47191759 | -          |
| rs4940059   | 18:51182734-51182734 | MEX3C      |
| rs1893378   | 18:51192490-51192490 | MEX3C      |
| rs982983    | 18:52504938-52504938 | DCC        |
| rs28634172  | 18:58822814-58822814 | AC104365.1 |
| rs3891810   | 18:69111089-69111089 | -          |
| rs62091919  | 18:70283206-70283206 | -          |
| rs10409758  | 19:1835953-1835953   | REXO1      |
| rs55818311  | 19:2341049-2341049   | SPPL2B     |
| rs757322    | 19:2360856-2360856   | TMPRSS9    |
| rs12986109  | 19:2360969-2360969   | TMPRSS9    |
| rs72987495  | 19:2366244-2366244   | TMPRSS9    |
| rs11883051  | 19:6284444-6284444   | MLLT1      |
| rs12979469  | 19:10619676-10619676 | SLC44A2    |
| rs79277649  | 19:31529094-31529094 | LINC02841  |
| rs6509231   | 19:45655035-45655035 | RN7SL836P  |
| rs4802553   | 19:49089723-49089723 | SNRNP70    |
| rs4801935   | 19:52775042-52775042 | ZNF600     |
| rs59858465  | 19:56401627-56401627 | ZNF583     |
| rs141547530 | 2:3188750-3188750    | EIPR1      |
| rs66504853  | 2:18103688-18103688  | KCNS3      |
| rs13387530  | 2:23720859-23720859  | -          |
| rs72780106  | 2:23761964-23761964  | ATAD2B     |
| rs34686340  | 2:24019080-24019080  | MFSD2B     |
| rs56392651  | 2:24032338-24032338  | WDCP       |
| rs4666140   | 2:28926185-28926185  | WDR43      |
| rs10182170  | 2:32479118-32479118  | BIRC6      |
| rs74818005  | 2:33653613-33653613  | AC017050.1 |

|             |                       |            |
|-------------|-----------------------|------------|
| rs139870826 | 2:50817985-50817985   | NRXN1      |
| rs9309337   | 2:61536072-61536072   | XPO1       |
| rs34298249  | 2:62489836-62489836   | RN7SL18P   |
| rs62178016  | 2:62507763-62507763   | TMEM17     |
| rs13416004  | 2:69437844-69437844   | NFU1       |
| rs4852283   | 2:69567218-69567218   | AAK1       |
| rs60806696  | 2:94889836-94889836   | AC097374.1 |
| rs116778080 | 2:95035241-95035241   | MAL        |
| rs3105099   | 2:95041774-95041774   | MAL        |
| rs3772044   | 2:95300298-95300298   | KCNIP3     |
| rs112032343 | 2:95378266-95378266   | KCNIP3     |
| rs6734326   | 2:96903998-96903998   | FAM178B    |
| rs75094400  | 2:101525580-101525580 | PRCPP1     |
| rs13013794  | 2:101670030-101670030 | -          |
| rs7590913   | 2:101689491-101689491 | -          |
| rs62155725  | 2:101735899-101735899 | MAP4K4     |
| rs2298942   | 2:101852162-101852162 | MAP4K4     |
| rs10865049  | 2:101954596-101954596 | -          |
| rs35789178  | 2:101987463-101987463 | IL1R2      |
| rs13020571  | 2:102042170-102042170 | AC007271.1 |
| rs61080885  | 2:102050083-102050083 | AC007271.1 |
| rs144201388 | 2:107997366-107997366 | SLC5A7     |
| rs1219690   | 2:122487007-122487007 | AC011246.1 |
| rs62166133  | 2:133810032-133810032 | -          |
| rs115570081 | 2:134682340-134682340 | TMEM163    |
| rs10928510  | 2:134686370-134686370 | TMEM163    |
| rs10445684  | 2:134818755-134818755 | CCNT2-AS1  |
| rs78793148  | 2:136023692-136023692 | DARS-AS1   |
| rs77734975  | 2:144750626-144750626 | TEX41      |
| rs150409445 | 2:145016457-145016457 | TEX41      |
| rs723681    | 2:147910940-147910940 | ACVR2A     |
| rs1965812   | 2:157814786-157814786 | ACVR1      |
| rs4547489   | 2:160302714-160302714 | RBMS1      |
| rs58757862  | 2:160378941-160378941 | RBMS1      |
| rs7572202   | 2:160429040-160429040 | RBMS1      |
| rs353128    | 2:165282098-165282098 | SCN2A      |
| rs6740895   | 2:165283510-165283510 | SCN2A      |
| rs353139    | 2:165289717-165289717 | SCN2A      |
| rs1816918   | 2:165322847-165322847 | SCN2A      |
| rs75629463  | 2:166127885-166127885 | SCN1A      |
| rs7589835   | 2:166216341-166216341 | SCN9A      |
| rs115032219 | 2:166265206-166265206 | SCN9A      |
| rs1900831   | 2:168122780-168122780 | STK39      |
| rs12995897  | 2:168217639-168217639 | STK39      |
| rs1517320   | 2:168225732-168225732 | STK39      |
| rs13385320  | 2:168229316-168229316 | STK39      |

|             |                       |            |
|-------------|-----------------------|------------|
| rs10175790  | 2:168238236-168238236 | STK39      |
| rs77611446  | 2:168249236-168249236 | STK39      |
| rs1474055   | 2:168253884-168253884 | -          |
| rs2724176   | 2:168285532-168285532 | -          |
| rs78851383  | 2:168318782-168318782 | -          |
| rs16855271  | 2:168319860-168319860 | -          |
| rs141858735 | 2:179466193-179466193 | ZNF385B    |
| rs262266    | 2:180012435-180012435 | -          |
| rs58695784  | 2:180057221-180057221 | -          |
| rs13397184  | 2:180961506-180961506 | -          |
| rs4853505   | 2:190382596-190382596 | -          |
| rs3811607   | 2:190435676-190435676 | MFSD6      |
| rs281787    | 2:199919515-199919515 | C2orf69    |
| rs28418905  | 2:208323118-208323118 | PIKFYVE    |
| rs145042764 | 2:208330711-208330711 | PIKFYVE    |
| rs2271543   | 2:218277768-218277768 | PNKD       |
| rs13000510  | 2:222500376-222500376 | SGPP2      |
| rs13010621  | 2:231009411-231009411 | SPATA3     |
| rs6758225   | 2:236030768-236030768 | AGAP1      |
| rs35449298  | 2:236034722-236034722 | AGAP1      |
| rs551859    | 2:238463195-238463195 | -          |
| rs7353549   | 20:793346-793346      | -          |
| rs2295545   | 20:3184040-3184040    | -          |
| rs6037501   | 20:3210559-3210559    | ITPA       |
| rs141459119 | 20:4623150-4623150    | RPS4XP2    |
| rs116158058 | 20:4652752-4652752    | RPS4XP2    |
| rs112864829 | 20:4861106-4861106    | SLC23A2    |
| rs111593423 | 20:6027580-6027580    | CRLS1      |
| rs4813918   | 20:10157279-10157279  | SNAP25-AS1 |
| rs11698183  | 20:25994949-25994949  | FAM182A    |
| rs78184009  | 20:31851317-31851317  | DUSP15     |
| rs6119287   | 20:32815400-32815400  | MAPRE1     |
| rs293727    | 20:33345258-33345258  | BPIFB9P    |
| rs6060042   | 20:34773918-34773918  | NCOA6      |
| rs6073118   | 20:43518146-43518146  | L3MBTL1    |
| rs729997    | 20:59411230-59411230  | -          |
| rs1736023   | 21:15440563-15440563  | AJ009632.2 |
| rs12626383  | 21:15462709-15462709  | AJ009632.2 |
| rs1688101   | 21:19347156-19347156  | RNU1-139P  |
| rs2835700   | 21:37350372-37350372  | AP001437.2 |
| rs11700462  | 21:37445510-37445510  | DYRK1A     |
| rs2248244   | 21:37480059-37480059  | DYRK1A     |
| rs73220444  | 21:37544098-37544098  | -          |
| rs8131708   | 21:40047976-40047976  | DSCAM      |
| rs9305690   | 21:40058461-40058461  | DSCAM      |
| rs2837413   | 21:40067182-40067182  | DSCAM      |



|             |                       |           |
|-------------|-----------------------|-----------|
| rs10222092  | 21:40082331-40082331  | DSCAM     |
| rs12482422  | 21:40605066-40605066  | DSCAM     |
| rs56379273  | 21:44406603-44406603  | TRPM2     |
| rs5751062   | 22:41202049-41202049  | L3MBTL2   |
| rs9611522   | 22:41231920-41231920  | L3MBTL2   |
| rs7290404   | 22:41353792-41353792  | ZC3H7B    |
| rs74667571  | 22:50348547-50348547  | PPP6R2    |
| rs17046610  | 3:7024398-7024398     | GRM7      |
| rs7652281   | 3:8764054-8764054     | OXTR      |
| rs55889070  | 3:18039779-18039779   | TBC1D5    |
| rs1108439   | 3:18159827-18159827   | TBC1D5    |
| rs9860554   | 3:18233751-18233751   | TBC1D5    |
| rs73038319  | 3:18320267-18320267   | TBC1D5    |
| rs78702810  | 3:18421039-18421039   | SATB1     |
| rs13095117  | 3:18704008-18704008   | SATB1-AS1 |
| rs341839    | 3:21379929-21379929   | -         |
| rs7617877   | 3:28664273-28664273   | RBMS3     |
| rs10764     | 3:33496538-33496538   | CLASP2    |
| rs6766294   | 3:33613646-33613646   | CLASP2    |
| rs17075283  | 3:43184728-43184728   | -         |
| rs75228828  | 3:46071391-46071391   | -         |
| rs1982510   | 3:47011447-47011447   | SETD2     |
| rs56273245  | 3:47273006-47273006   | KIF9      |
| rs76060013  | 3:47728436-47728436   | SMARCC1   |
| rs9862131   | 3:48160950-48160950   | CDC25A    |
| rs3731510   | 3:48179619-48179619   | CDC25A    |
| rs990211    | 3:48683607-48683607   | NCKIPSD   |
| rs6808104   | 3:48730444-48730444   | IP6K2     |
| rs137997194 | 3:48787504-48787504   | PRKAR2A   |
| rs144070260 | 3:48812596-48812596   | PRKAR2A   |
| rs143756010 | 3:49274815-49274815   | USP4      |
| rs115435316 | 3:49530748-49530748   | DAG1      |
| rs35726701  | 3:49703462-49703462   | RNF123    |
| rs34365302  | 3:52373396-52373396   | DNAH1     |
| rs613519    | 3:52434924-52434924   | SEMA3G    |
| rs13083798  | 3:52615732-52615732   | PBRM1     |
| rs6765687   | 3:52699090-52699090   | GLT8D1    |
| rs36051354  | 3:52951996-52951996   | SFMBT1    |
| rs2178563   | 3:54791743-54791743   | CACNA2D3  |
| rs114413724 | 3:56515937-56515937   | -         |
| rs28404421  | 3:58306758-58306758   | RPP14     |
| rs13085519  | 3:63650920-63650920   | SNTN      |
| rs139277004 | 3:85818345-85818345   | CADM2     |
| rs4928106   | 3:101044767-101044767 | -         |
| rs35489993  | 3:121693029-121693029 | GOLGB1    |
| rs4676755   | 3:121813788-121813788 | IQCB1     |

|             |                       |            |
|-------------|-----------------------|------------|
| rs112613540 | 3:122348040-122348040 | -          |
| rs116555124 | 3:122458413-122458413 | KPNA1      |
| rs55961674  | 3:122478045-122478045 | KPNA1      |
| rs7650313   | 3:122852588-122852588 | SLC49A4    |
| rs62408931  | 3:137110076-137110076 | -          |
| rs79329661  | 3:141569914-141569914 | RASA2      |
| rs12485508  | 3:151383958-151383958 | MED12L     |
| rs3821665   | 3:151416028-151416028 | MED12L     |
| rs1426385   | 3:152280264-152280264 | MBNL1      |
| rs7629065   | 3:152412201-152412201 | MBNL1      |
| rs2222275   | 3:155641090-155641090 | PLCH1      |
| rs115083552 | 3:156226229-156226229 | KCNAB1     |
| rs11717272  | 3:161092567-161092567 | B3GALNT1   |
| rs1450522   | 3:161359842-161359842 | SPTSSB     |
| rs77931272  | 3:167967106-167967106 | -          |
| rs1967027   | 3:176245762-176245762 | -          |
| rs73177372  | 3:182946022-182946022 | DCUN1D1    |
| rs76291226  | 3:183007775-183007775 | -          |
| rs10513789  | 3:183042285-183042285 | MCCC1      |
| rs574718    | 3:183130193-183130193 | LAMP3      |
| rs79447920  | 3:183134426-183134426 | LAMP3      |
| rs79155994  | 3:183144347-183144347 | LAMP3      |
| rs580116    | 3:183154658-183154658 | LAMP3      |
| rs13084610  | 3:183163009-183163009 | LAMP3      |
| rs151139359 | 3:183218620-183218620 | MCF2L2     |
| rs13066057  | 3:183224883-183224883 | MCF2L2     |
| rs73191724  | 3:187271636-187271636 | MASP1      |
| rs28743077  | 4:714453-714453       | PCGF3      |
| rs11728488  | 4:716711-716711       | PCGF3      |
| rs7376288   | 4:747954-747954       | PCGF3      |
| rs3755966   | 4:764656-764656       | PCGF3      |
| rs62294076  | 4:765675-765675       | PCGF3      |
| rs77943567  | 4:808356-808356       | CPLX1      |
| rs147786984 | 4:814396-814396       | CPLX1      |
| rs7376690   | 4:819938-819938       | CPLX1      |
| rs11727899  | 4:833797-833797       | AC139887.3 |
| rs11736866  | 4:837393-837393       | AC139887.3 |
| rs2306241   | 4:850247-850247       | GAK        |
| rs150789675 | 4:853009-853009       | GAK        |
| rs144026795 | 4:880113-880113       | GAK        |
| rs2279187   | 4:881741-881741       | GAK        |
| rs3775119   | 4:899924-899924       | GAK        |
| rs3775115   | 4:903225-903225       | GAK        |
| rs62297083  | 4:903640-903640       | GAK        |
| rs6826191   | 4:903876-903876       | GAK        |
| rs139951812 | 4:905058-905058       | GAK        |

|             |                     |            |
|-------------|---------------------|------------|
| rs116272755 | 4:908016-908016     | GAK        |
| rs11724439  | 4:916733-916733     | GAK        |
| rs873786    | 4:931588-931588     | TMEM175    |
| rs34311866  | 4:958159-958159     | TMEM175    |
| rs4690326   | 4:959910-959910     | TMEM175    |
| rs111344337 | 4:973547-973547     | DGKQ       |
| rs147250021 | 4:988557-988557     | IDUA       |
| rs10471250  | 4:995925-995925     | IDUA       |
| rs148959726 | 4:999600-999600     | IDUA       |
| rs10018140  | 4:1007954-1007954   | IDUA       |
| rs35654957  | 4:1016289-1016289   | FGFRL1     |
| rs73219733  | 4:1019846-1019846   | FGFRL1     |
| rs4450872   | 4:1030938-1030938   | FGFRL1     |
| rs35321695  | 4:1036991-1036991   | -          |
| rs17742599  | 4:1318606-1318606   | MAEA       |
| rs2071695   | 4:2899622-2899622   | ADD1       |
| rs3021131   | 4:2917248-2917248   | ADD1       |
| rs1269355   | 4:2960056-2960056   | NOP14      |
| rs79419636  | 4:14165572-14165572 | AC092546.1 |
| rs17470482  | 4:15352611-15352611 | C1QTNF7    |
| rs79867298  | 4:15582292-15582292 | CC2D2A     |
| rs4270584   | 4:15599176-15599176 | CC2D2A     |
| rs1786      | 4:15662830-15662830 | FBXL5      |
| rs60040560  | 4:15695843-15695843 | FAM200B    |
| rs4631042   | 4:15710927-15710927 | BST1       |
| rs73224662  | 4:15714466-15714466 | BST1       |
| rs12502586  | 4:15724941-15724941 | BST1       |
| rs12649015  | 4:15731397-15731397 | BST1       |
| rs2286879   | 4:15739257-15739257 | AC005798.1 |
| rs115383994 | 4:15749428-15749428 | -          |
| rs73226561  | 4:15794465-15794465 | CD38       |
| rs35852935  | 4:17989899-17989899 | LCORL      |
| rs13125804  | 4:17996420-17996420 | LCORL      |
| rs56182412  | 4:41286424-41286424 | -          |
| rs6532189   | 4:76100280-76100280 | ART3       |
| rs4859424   | 4:76110199-76110199 | NUP54      |
| rs113464411 | 4:76163978-76163978 | SCARB2     |
| rs12512579  | 4:76189879-76189879 | SCARB2     |
| rs13111888  | 4:76210141-76210141 | SCARB2     |
| rs78737354  | 4:76215705-76215705 | SCARB2     |
| rs11531413  | 4:76227031-76227031 | FAM47E     |
| rs72655564  | 4:76248723-76248723 | FAM47E     |
| rs13117238  | 4:76252761-76252761 | FAM47E     |
| rs13149410  | 4:76252919-76252919 | FAM47E     |
| rs2904221   | 4:76260880-76260880 | FAM47E     |
| rs6812193   | 4:76277833-76277833 | FAM47E     |

|             |                     |            |
|-------------|---------------------|------------|
| rs1542096   | 4:76283347-76283347 | FAM47E     |
| rs79438017  | 4:76340366-76340366 | CCDC158    |
| rs4859670   | 4:76418579-76418579 | CCDC158    |
| rs17001966  | 4:76447040-76447040 | SHROOM3    |
| rs1986734   | 4:76499631-76499631 | SHROOM3    |
| rs10004356  | 4:76543872-76543872 | SHROOM3    |
| rs17015458  | 4:89350743-89350743 | -          |
| rs114762839 | 4:89447394-89447394 | AC093866.1 |
| rs113166402 | 4:89479010-89479010 | AC093866.1 |
| rs112744012 | 4:89491284-89491284 | AC093866.1 |
| rs11736388  | 4:89527919-89527919 | AC093866.1 |
| rs56958658  | 4:89528456-89528456 | AC093866.1 |
| rs67262058  | 4:89532090-89532090 | AC093866.1 |
| rs10018847  | 4:89578394-89578394 | AC093866.1 |
| rs12512230  | 4:89582452-89582452 | AC093866.1 |
| rs72655899  | 4:89617316-89617316 | AC093866.1 |
| rs116040410 | 4:89621988-89621988 | AC093866.1 |
| rs79208813  | 4:89624344-89624344 | AC093866.1 |
| rs79083944  | 4:89625335-89625335 | AC093866.1 |
| rs10027842  | 4:89630392-89630392 | AC093866.1 |
| rs13140923  | 4:89645318-89645318 | AC093866.1 |
| rs142824388 | 4:89648089-89648089 | AC093866.1 |
| rs356231    | 4:89652245-89652245 | AC093866.1 |
| rs72657707  | 4:89657360-89657360 | AC093866.1 |
| rs111763892 | 4:89661030-89661030 | AC093866.1 |
| rs145954321 | 4:89676494-89676494 | AC093866.1 |
| rs7697331   | 4:89679848-89679848 | AC093866.1 |
| rs9996301   | 4:89685485-89685485 | AC093866.1 |
| rs17286290  | 4:89697113-89697113 | AC093866.1 |
| rs71609573  | 4:89703442-89703442 | AC093866.1 |
| rs12505231  | 4:89704658-89704658 | AC093866.1 |
| rs356182    | 4:89704960-89704960 | AC093866.1 |
| rs71609574  | 4:89706816-89706816 | AC093866.1 |
| rs114685218 | 4:89710874-89710874 | AC093866.1 |
| rs62306284  | 4:89721380-89721380 | SNCA       |
| rs17180453  | 4:89731983-89731983 | SNCA       |
| rs35267877  | 4:89744512-89744512 | SNCA       |
| rs1372518   | 4:89836143-89836143 | SNCA       |
| rs116227916 | 4:89842088-89842088 | SNCA       |
| rs111578789 | 4:89852969-89852969 | -          |
| rs72657784  | 4:89867792-89867792 | -          |
| rs7693616   | 4:89871079-89871079 | -          |
| rs114828194 | 4:89883381-89883381 | MMRN1      |
| rs72657797  | 4:89899658-89899658 | MMRN1      |
| rs17806425  | 4:89914407-89914407 | MMRN1      |
| rs79214011  | 4:89938128-89938128 | MMRN1      |

|             |                       |            |
|-------------|-----------------------|------------|
| rs145948000 | 4:89961392-89961392   | -          |
| rs17016417  | 4:90001148-90001148   | AC105445.1 |
| rs139616478 | 4:90006087-90006087   | -          |
| rs13107054  | 4:90061761-90061761   | -          |
| rs73832568  | 4:90091011-90091011   | -          |
| rs140962713 | 4:90103027-90103027   | -          |
| rs17810668  | 4:90136643-90136643   | CCSER1     |
| rs116166250 | 4:90212111-90212111   | CCSER1     |
| rs77713265  | 4:90242889-90242889   | CCSER1     |
| rs77738892  | 4:90386840-90386840   | CCSER1     |
| rs78077825  | 4:90433339-90433339   | CCSER1     |
| rs116582845 | 4:90502748-90502748   | CCSER1     |
| rs17240838  | 4:90612466-90612466   | CCSER1     |
| rs13107325  | 4:102267552-102267552 | SLC39A8    |
| rs13117519  | 4:113447909-113447909 | CAMK2D     |
| rs62314976  | 4:113464520-113464520 | CAMK2D     |
| rs7689195   | 4:113477097-113477097 | CAMK2D     |
| rs17046126  | 4:113510917-113510917 | CAMK2D     |
| rs4834349   | 4:113526035-113526035 | CAMK2D     |
| rs6821748   | 4:127907256-127907256 | -          |
| rs9993435   | 4:128164348-128164348 | LARP1B     |
| rs7687276   | 4:169398320-169398320 | NEK1       |
| rs17055075  | 4:169652145-169652145 | CLCN3      |
| rs62333164  | 4:169662006-169662006 | CLCN3      |
| rs34181295  | 4:188735497-188735497 | AC093909.1 |
| rs116699996 | 5:28167023-28167023   | -          |
| rs3797237   | 5:54241912-54241912   | ARL15      |
| rs10074908  | 5:60538793-60538793   | PART1      |
| rs78348576  | 5:60548774-60548774   | PART1      |
| rs4700387   | 5:60740924-60740924   | KRT8P31    |
| rs78620886  | 5:60791509-60791509   | ELOVL7     |
| rs142805273 | 5:60831468-60831468   | ELOVL7     |
| rs139357177 | 5:60841561-60841561   | ELOVL7     |
| rs158927    | 5:60933439-60933439   | ERCC8      |
| rs78984066  | 5:60954235-60954235   | NDUFAF2    |
| rs76339698  | 5:61076761-61076761   | NDUFAF2    |
| rs256376    | 5:61186277-61186277   | SMIM15-AS1 |
| rs10052849  | 5:61238254-61238254   | LINC02057  |
| rs10471513  | 5:61307635-61307635   | LINC02057  |
| rs6453214   | 5:76288598-76288598   | SV2C       |
| rs10060273  | 5:80322830-80322830   | SPZ1       |
| rs112216323 | 5:80352963-80352963   | AC026410.3 |
| rs13161403  | 5:88471144-88471144   | AC091826.3 |
| rs60470187  | 5:90756146-90756146   | ADGRV1     |
| rs7709726   | 5:102991759-102991759 | PAM        |
| rs377192    | 5:103267853-103267853 | MACIR      |

|             |                       |             |
|-------------|-----------------------|-------------|
| rs2561481   | 5:103358411-103358411 | -           |
| rs10061674  | 5:103371008-103371008 | -           |
| rs294068    | 5:103467697-103467697 | PDZPH1P     |
| rs76801032  | 5:107836324-107836324 | -           |
| rs28786120  | 5:120359407-120359407 | AC113418.1  |
| rs112723361 | 5:120490287-120490287 | PRR16       |
| rs4282308   | 5:124690450-124690450 | ZNF608      |
| rs11241766  | 5:124741569-124741569 | ZNF608      |
| rs6875262   | 5:124774580-124774580 | -           |
| rs1078675   | 5:124881569-124881569 | LINC02240   |
| rs57750646  | 5:132344571-132344571 | SLC22A4     |
| rs77949585  | 5:134588788-134588788 | -           |
| rs11950533  | 5:134863415-134863415 | C5orf24     |
| rs13361619  | 5:138312990-138312990 | CDC25C      |
| rs3798153   | 5:138446515-138446515 | REEP2       |
| rs12657476  | 5:151186635-151186635 | CCDC69      |
| rs113516381 | 5:177030476-177030476 | ZNF346      |
| rs3846912   | 6:13656808-13656808   | RANBP9      |
| rs1204148   | 6:13817127-13817127   | MCUR1       |
| rs625964    | 6:20016736-20016736   | -           |
| rs6909187   | 6:25785697-25785697   | SLC17A1     |
| rs62396221  | 6:26285520-26285520   | H4C8        |
| rs9379946   | 6:26968286-26968286   | LINC00240   |
| rs7764984   | 6:27066402-27066402   | -           |
| rs7771953   | 6:27303564-27303564   | POM121L2    |
| rs2235233   | 6:27312073-27312073   | POM121L2    |
| rs9461358   | 6:27330051-27330051   | VN1R10P     |
| rs9468076   | 6:27371111-27371111   | ZNF391      |
| rs6931659   | 6:27508813-27508813   | AL021918.2  |
| rs6936653   | 6:27597051-27597051   | RNU6-471P   |
| rs17693877  | 6:27739267-27739267   | GPR89P      |
| rs4140646   | 6:27771022-27771022   | -           |
| rs149979    | 6:28023229-28023229   | ZSCAN16-AS1 |
| rs149957    | 6:28069242-28069242   | OR1F12      |
| rs17767294  | 6:28086420-28086420   | ZNF165      |
| rs11970409  | 6:28627330-28627330   | -           |
| rs9378107   | 6:28793906-28793906   | -           |
| rs3117434   | 6:29295973-29295973   | AL672167.1  |
| rs4947236   | 6:29755897-29755897   | IFITM4P     |
| rs1611182   | 6:29813272-29813272   | MICG        |
| rs3128908   | 6:29856490-29856490   | AL645929.3  |
| rs2517718   | 6:29948614-29948614   | HLA-A       |
| rs2240068   | 6:30108853-30108853   | TRIM31      |
| rs9261439   | 6:30122560-30122560   | -           |
| rs3132676   | 6:30148301-30148301   | TRIM40      |
| rs4493062   | 6:30248780-30248780   | HCG17       |

|             |                     |            |
|-------------|---------------------|------------|
| rs2016216   | 6:30410049-30410049 | MICC       |
| rs4713327   | 6:30415991-30415991 | MICC       |
| rs1265075   | 6:31145336-31145336 | CCHCR1     |
| rs9263850   | 6:31188411-31188411 | -          |
| rs28397271  | 6:31196866-31196866 | HCG27      |
| rs6930643   | 6:31206258-31206258 | HCG27      |
| rs28744244  | 6:31209999-31209999 | -          |
| rs2853923   | 6:31297960-31297960 | LINC02571  |
| rs6909636   | 6:31378822-31378822 | ZDHHC20P2  |
| rs3130062   | 6:31558135-31558135 | NFKBIL1    |
| rs3115668   | 6:31673708-31673708 | LY6G5C     |
| rs494620    | 6:31870936-31870936 | SLC44A4    |
| rs1738434   | 6:31976259-31976259 | DXO        |
| rs17208000  | 6:32142161-32142161 | -          |
| rs3130346   | 6:32163733-32163733 | PPT2       |
| rs9267922   | 6:32238688-32238688 | -          |
| rs2073044   | 6:32371209-32371209 | TSBP1      |
| rs9268402   | 6:32373576-32373576 | TSBP1      |
| rs9268499   | 6:32407918-32407918 | BTNL2      |
| rs9268500   | 6:32408740-32408740 | BTNL2      |
| rs3135359   | 6:32422801-32422801 | -          |
| rs4321864   | 6:32431410-32431410 | -          |
| rs9268652   | 6:32441279-32441279 | HLA-DRA    |
| rs3177928   | 6:32444658-32444658 | HLA-DRA    |
| rs3135384   | 6:32452182-32452182 | -          |
| rs9268932   | 6:32465513-32465513 | HLA-DRB9   |
| rs9271149   | 6:32609678-32609678 | -          |
| rs536810    | 6:32609720-32609720 | -          |
| rs532965    | 6:32610196-32610196 | -          |
| rs4959105   | 6:32615369-32615369 | -          |
| rs9271375   | 6:32619290-32619290 | -          |
| rs28383314  | 6:32619436-32619436 | -          |
| rs9271500   | 6:32621523-32621523 | -          |
| rs9275211   | 6:32690067-32690067 | -          |
| rs2858329   | 6:32691024-32691024 | -          |
| rs9275348   | 6:32699861-32699861 | -          |
| rs1794275   | 6:32703471-32703471 | MTCO3P1    |
| rs9275546   | 6:32708668-32708668 | MTCO3P1    |
| rs2858331   | 6:32713500-32713500 | AL662789.1 |
| rs3873448   | 6:32715278-32715278 | AL662789.1 |
| rs9276434   | 6:32744889-32744889 | HLA-DQA2   |
| rs35805736  | 6:32794748-32794748 | -          |
| rs6457681   | 6:32805720-32805720 | -          |
| rs115360810 | 6:32828533-32828533 | TAP2       |
| rs206776    | 6:32985934-32985934 | BRD2       |
| rs206775    | 6:32986857-32986857 | -          |

|             |                       |            |
|-------------|-----------------------|------------|
| rs1442222   | 6:46246324-46246324   | RCAN2      |
| rs9446462   | 6:71747595-71747595   | -          |
| rs10455248  | 6:71772755-71772755   | -          |
| rs9442714   | 6:71779330-71779330   | -          |
| rs9389810   | 6:99881570-99881570   | -          |
| rs9481193   | 6:111810445-111810445 | FYN        |
| rs57650567  | 6:111851753-111851753 | FYN        |
| rs17073085  | 6:111947496-111947496 | -          |
| rs36142021  | 6:118838319-118838319 | MCM9       |
| rs12206988  | 6:119085363-119085363 | FAM184A    |
| rs6569038   | 6:119095307-119095307 | FAM184A    |
| rs7769687   | 6:125912545-125912545 | NCOA7      |
| rs78243222  | 6:132726490-132726490 | VNN3       |
| rs75859381  | 6:132889222-132889222 | AL137783.1 |
| rs117701920 | 6:132987766-132987766 | LINC00326  |
| rs12662170  | 6:150925255-150925255 | MTHFD1L    |
| rs9365002   | 6:158903689-158903689 | C6orf99    |
| rs77846331  | 6:159910464-159910464 | MAS1       |
| rs7744123   | 6:168219979-168219979 | AL606970.5 |
| rs73047368  | 7:2726762-2726762     | GNA12      |
| rs78391336  | 7:2793074-2793074     | GNA12      |
| rs113918424 | 7:6333933-6333933     | FAM220A    |
| rs61247228  | 7:6612156-6612156     | C7orf26    |
| rs12702597  | 7:7272864-7272864     | AC005532.1 |
| rs2041361   | 7:22995675-22995675   | FAM126A    |
| rs7782981   | 7:23064778-23064778   | -          |
| rs78614415  | 7:23109624-23109624   | KLHL7      |
| rs77551378  | 7:23178069-23178069   | NUP42      |
| rs1728313   | 7:23231412-23231412   | GPNMB      |
| rs34323745  | 7:23272449-23272449   | GPNMB      |
| rs1964536   | 7:23340566-23340566   | IGF2BP3    |
| rs62468198  | 7:23343361-23343361   | IGF2BP3    |
| rs10488282  | 7:23343516-23343516   | IGF2BP3    |
| rs35620312  | 7:23387177-23387177   | IGF2BP3    |
| rs111665084 | 7:23388101-23388101   | IGF2BP3    |
| rs377383    | 7:23395434-23395434   | IGF2BP3    |
| rs188081801 | 7:23564549-23564549   | AC006026.1 |
| rs140622649 | 7:36358639-36358639   | KIAA0895   |
| rs78241966  | 7:36446251-36446251   | ANLN       |
| rs41279603  | 7:43943193-43943193   | UBE2D4     |
| rs62469301  | 7:65202049-65202049   | INTS4P1    |
| rs118157596 | 7:65908978-65908978   | VKORC1L1   |
| rs12540307  | 7:66197780-66197780   | -          |
| rs62465432  | 7:66536369-66536369   | AC008267.3 |
| rs17138017  | 7:66927805-66927805   | TMEM248    |
| rs62466588  | 7:66993916-66993916   | SBDS       |



|             |                       |            |
|-------------|-----------------------|------------|
| rs1075007   | 7:78481252-78481252   | MAGI2      |
| rs62461391  | 7:82854172-82854172   | PCLO       |
| rs76083843  | 7:89304380-89304380   | ZNF804B    |
| rs10215799  | 7:94675032-94675032   | -          |
| rs17166875  | 7:95411959-95411959   | PON2       |
| rs2237585   | 7:95420506-95420506   | PON2       |
| rs4595055   | 7:95707291-95707291   | -          |
| rs6979335   | 7:100492237-100492237 | NYAP1      |
| rs7805498   | 7:100537297-100537297 | AGFG2      |
| rs4599742   | 7:106050650-106050650 | -          |
| rs76305012  | 7:117557301-117557301 | CFTR       |
| rs79006095  | 7:120333784-120333784 | KCND2      |
| rs73166011  | 7:149436878-149436878 | ZNF777     |
| rs1971411   | 8:8415897-8415897     | AC103957.1 |
| rs2921073   | 8:8450133-8450133     | -          |
| rs17153607  | 8:11657684-11657684   | -          |
| rs117059721 | 8:11704908-11704908   | GATA4      |
| rs11785481  | 8:11759633-11759633   | GATA4      |
| rs2686197   | 8:11804411-11804411   | FDFT1      |
| rs1736060   | 8:11807229-11807229   | FDFT1      |
| rs80040100  | 8:11812167-11812167   | FDFT1      |
| rs3735810   | 8:11835332-11835332   | FDFT1      |
| rs6990033   | 8:11835869-11835869   | FDFT1      |
| rs62495697  | 8:11851498-11851498   | CTSB       |
| rs73209041  | 8:11857432-11857432   | CTSB       |
| rs589518    | 8:16839151-16839151   | AC011586.2 |
| rs576703    | 8:16846568-16846568   | AC011586.2 |
| rs823425    | 8:16857814-16857814   | AC011586.2 |
| rs34937419  | 8:16859081-16859081   | AC011586.2 |
| rs1960437   | 8:16873245-16873245   | AC011586.2 |
| rs62492658  | 8:22627473-22627473   | BIN3       |
| rs4424255   | 8:22664616-22664616   | BIN3       |
| rs2280104   | 8:22668467-22668467   | BIN3       |
| rs1532278   | 8:27608798-27608798   | CLU        |
| rs7837112   | 8:28907976-28907976   | HMBX1      |
| rs7011522   | 8:35029242-35029242   | -          |
| rs118027082 | 8:73952340-73952340   | ELOC       |
| rs117582595 | 8:104624038-104624038 | ZFPM2      |
| rs12541194  | 8:104637830-104637830 | ZFPM2      |
| rs6469271   | 8:109632545-109632545 | SYBU       |
| rs800902    | 8:115416489-115416489 | TRPS1      |
| rs73337990  | 8:124422412-124422412 | -          |
| rs17372350  | 8:124576693-124576693 | MTSS1      |
| rs3857948   | 8:124598539-124598539 | MTSS1      |
| rs10103418  | 8:129886017-129886017 | CYRIB      |
| rs2086641   | 8:129889663-129889663 | CYRIB      |

|             |                       |            |
|-------------|-----------------------|------------|
| rs298606    | 8:129927276-129927276 | CYRIB      |
| rs1902015   | 8:130028693-130028693 | -          |
| rs28396295  | 8:130383466-130383466 | ASAP1      |
| rs75393804  | 8:134506857-134506857 | ZFAT       |
| rs75582926  | 8:134523293-134523293 | ZFAT       |
| rs1060832   | 8:140531789-140531789 | AGO2       |
| rs149865921 | 8:141499890-141499890 | MROH5      |
| rs117511259 | 9:4064097-4064097     | GLIS3      |
| rs2754320   | 9:17540625-17540625   | -          |
| rs116439081 | 9:17576064-17576064   | SH3GL2     |
| rs117244129 | 9:17577945-17577945   | SH3GL2     |
| rs10756891  | 9:17584276-17584276   | SH3GL2     |
| rs10963177  | 9:17639460-17639460   | SH3GL2     |
| rs2038521   | 9:17640024-17640024   | SH3GL2     |
| rs10810834  | 9:17713237-17713237   | SH3GL2     |
| rs3808689   | 9:17723232-17723232   | SH3GL2     |
| rs2209440   | 9:17736344-17736344   | SH3GL2     |
| rs75170096  | 9:17741228-17741228   | SH3GL2     |
| rs3824370   | 9:17758947-17758947   | SH3GL2     |
| rs11777538  | 9:17799676-17799676   | SH3GL2     |
| rs12236209  | 9:17828041-17828041   | -          |
| rs78062691  | 9:32257417-32257417   | -          |
| rs10122038  | 9:33911057-33911057   | UBE2R2     |
| rs2026658   | 9:34156814-34156814   | -          |
| rs76639411  | 9:80868137-80868137   | AL138749.1 |
| rs2025943   | 9:89153960-89153960   | SHC3       |
| rs7862334   | 9:90493810-90493810   | LINC01501  |
| rs10821079  | 9:93161958-93161958   | -          |
| rs13289468  | 9:125418053-125418053 | AL627223.2 |
| rs13283793  | 9:125679362-125679362 | MAPKAP1    |
| rs113253813 | 9:127498834-127498834 | LRSAM1     |

**Supplementary table 4: SNPs included in the ‘best’ PRS, after exclusion of all SNPs within a 1MB window of PD risk loci.. Annotations are given in hg38 and nearest genes are derived from Ensembl Variant Event Predictor.**

| RSID        | CHR:BP (hg38)          | Nearest gene |
|-------------|------------------------|--------------|
| rs845250    | 1:7423291-7423291      | CAMTA1       |
| rs77901899  | 1:62271453-62271453    | KANK4        |
| rs148303184 | 1:62567432-62567432    | DOCK7        |
| rs4655643   | 1:66624416-66624416    | SGIP1        |
| rs11208947  | 1:66689781-66689781    | SGIP1        |
| rs278839    | 1:77642189-77642189    | AC118549.1   |
| rs11164880  | 1:93192539-93192539    | CCDC18       |
| rs114809584 | 1:96889283-96889283    | -            |
| rs9728526   | 1:145718303-145718303  | CD160        |
| rs74916032  | 1:147535311-147535311  | -            |
| rs201694776 | 1:152616206-152616206  | LCE3B        |
| rs12748659  | 1:156330207-156330207  | CCT3         |
| rs12141455  | 1:193352957-193352957  | LINC01031    |
| rs55922528  | 1:194585600-194585600  | -            |
| rs78203442  | 1:194766300-194766300  | -            |
| rs116592662 | 1:194863221-194863221  | AL353072.2   |
| rs4915470   | 1:200965282-200965282  | KIF21B       |
| rs296562    | 1:200976146-200976146  | KIF21B       |
| rs55925257  | 1:227871638-227871638  | -            |
| rs147393995 | 1:228039106-228039106  | WNT3A        |
| rs34249947  | 1:228136466-228136466  | GUK1         |
| rs9428576   | 1:243498725-243498725  | AKT3         |
| rs12408455  | 1:243578639-243578639  | AKT3         |
| rs79305906  | 10:22679230-22679230   | PIP4K2A      |
| rs2754493   | 10:38362521-38362521   | HSD17B7P2    |
| rs2489678   | 10:42458987-42458987   | CCNYL2       |
| rs11239219  | 10:44720664-44720664   | -            |
| rs10857613  | 10:48621632-48621632   | ARHGAP22     |
| rs17721694  | 10:50407533-50407533   | SGMS1        |
| rs72809473  | 10:75695702-75695702   | LRMDA        |
| rs846578    | 10:76739750-76739750   | -            |
| rs111691636 | 10:77615783-77615783   | KCNMA1       |
| rs3781273   | 10:93643216-93643216   | PDE6C        |
| rs142328600 | 10:94008085-94008085   | -            |
| rs10882978  | 10:97663991-97663991   | PI4K2A       |
| rs3740484   | 10:100987606-100987606 | SEMA4G       |
| rs117542248 | 10:117751683-117751683 | LINC02674    |
| rs3117448   | 10:132351935-132351935 | LRRC27       |
| rs117011293 | 11:527311-527311       | HRAS         |
| rs4963136   | 11:549119-549119       | LRRC56       |
| rs10835060  | 11:1466913-1466913     | BRSK2        |
| rs10840502  | 11:2179719-2179719     | -            |

|             |                        |            |
|-------------|------------------------|------------|
| rs7933395   | 11:7508194-7508194     | OLFML1     |
| rs117735090 | 11:16316761-16316761   | SOX6       |
| rs71486884  | 11:18867847-18867847   | MRGPRX7P   |
| rs71486893  | 11:19050438-19050438   | MRGPRX2    |
| rs11038679  | 11:45837836-45837836   | -          |
| rs139014611 | 11:47368136-47368136   | SPI1       |
| rs3911022   | 11:58019480-58019480   | OR9Q1      |
| rs66573492  | 11:58416324-58416324   | OR5B2      |
| rs1938602   | 11:58648003-58648003   | GLYAT      |
| rs17494956  | 11:66224968-66224968   | PACS1      |
| rs74527019  | 11:97638101-97638101   | -          |
| rs2509049   | 11:119095811-119095811 | DPAGT1     |
| rs7104278   | 11:129386409-129386409 | BARX2      |
| rs148287061 | 12:21588466-21588466   | GYS2       |
| rs11047823  | 12:25090336-25090336   | LRMP       |
| rs10843831  | 12:30742317-30742317   | CAPRIN2    |
| rs77669894  | 12:32089513-32089513   | -          |
| rs189221759 | 12:32300735-32300735   | BICD1      |
| rs140427697 | 12:32338739-32338739   | BICD1      |
| rs146492306 | 12:33108774-33108774   | -          |
| rs117154291 | 12:33403716-33403716   | SYT10      |
| rs190651674 | 12:34044984-34044984   | AC046130.2 |
| rs144029582 | 12:41754811-41754811   | -          |
| rs146006335 | 12:42925453-42925453   | AC068802.1 |
| rs2131709   | 12:44500625-44500625   | AC025253.1 |
| rs10876470  | 12:53629707-53629707   | ATF7       |
| rs71465151  | 12:62379067-62379067   | USP15      |
| rs17661390  | 12:62452666-62452666   | -          |
| rs118024659 | 12:63868716-63868716   | SRGAP1     |
| rs10777819  | 12:96903139-96903139   | NEDD1      |
| rs73168309  | 12:101806240-101806240 | GNPTAB     |
| rs17032033  | 12:101893012-101893012 | DRAM1      |
| rs140811937 | 12:101925840-101925840 | DRAM1      |
| rs17038460  | 12:106454636-106454636 | POLR3B     |
| rs4964178   | 12:106532721-106532721 | AC079385.1 |
| rs11113811  | 12:108315135-108315135 | CMKLR1     |
| rs10850060  | 12:109345885-109345885 | MYO1H      |
| rs10774803  | 12:109620415-109620415 | -          |
| rs113962677 | 12:130435916-130435916 | RIMBP2     |
| rs9507040   | 13:23166769-23166769   | LINC00362  |
| rs4769830   | 13:30402601-30402601   | AL161893.1 |
| rs9544930   | 13:35662291-35662291   | NBEA       |
| rs9575700   | 13:36263862-36263862   | CCDC169    |
| rs1805097   | 13:109782884-109782884 | IRS2       |
| rs9515121   | 13:109786818-109786818 | IRS2       |
| rs117146448 | 13:111206492-111206492 | ARHGEF7    |

|             |                        |            |
|-------------|------------------------|------------|
| rs3858827   | 13:111242333-111242333 | ARHGEF7    |
| rs11625412  | 14:21417638-21417638   | CHD8       |
| rs1954483   | 14:62066382-62066382   | AL390816.1 |
| rs2681735   | 14:72345817-72345817   | RGS6       |
| rs4900456   | 14:100145843-100145843 | DEGS2      |
| rs8008884   | 14:100187450-100187450 | -          |
| rs118122626 | 14:100735293-100735293 | DLK1       |
| rs142070567 | 15:29469344-29469344   | FAM189A1   |
| rs10851405  | 15:41516888-41516888   | LTK        |
| rs11635790  | 15:41588265-41588265   | TYRO3      |
| rs117618307 | 15:41738651-41738651   | MGA        |
| rs117549128 | 15:48705628-48705628   | -          |
| rs3098172   | 15:50480355-50480355   | USP8       |
| rs9635336   | 15:50506819-50506819   | USP8       |
| rs11071726  | 15:63098423-63098423   | AC087612.1 |
| rs116887089 | 15:97959417-97959417   | ARRDC4     |
| rs61747226  | 15:97969201-97969201   | ARRDC4     |
| rs1491184   | 15:97993366-97993366   | AC024651.1 |
| rs28385404  | 15:98034365-98034365   | AC022523.1 |
| rs12919274  | 16:1490005-1490005     | TELO2      |
| rs238680    | 16:1822159-1822159     | FAHD1      |
| rs72766631  | 16:2001427-2001427     | ZNF598     |
| rs8051877   | 16:2012064-2012064     | ZNF598     |
| rs26828     | 16:2194530-2194530     | CASKIN1    |
| rs1875206   | 16:9965150-9965150     | GRIN2A     |
| rs12444013  | 16:11614990-11614990   | LITAF      |
| rs3934986   | 16:81867991-81867991   | PLCG2      |
| rs3102347   | 16:89303461-89303461   | ANKRD11    |
| rs4785677   | 16:89488693-89488693   | ANKRD11    |
| rs55844265  | 17:16127463-16127463   | NCOR1      |
| rs2245737   | 17:18241406-18241406   | LLGL1      |
| rs62070807  | 17:29570113-29570113   | GIT1       |
| rs146420943 | 17:31597422-31597422   | AC007923.3 |
| rs56171152  | 17:38740498-38740498   | PCGF2      |
| rs28605133  | 17:50735379-50735379   | LUC7L3     |
| rs8066773   | 17:58524191-58524191   | SEPTIN4    |
| rs117987711 | 17:59033908-59033908   | TRIM37     |
| rs3088093   | 17:64129078-64129078   | ERN1       |
| rs72634334  | 17:82097050-82097050   | FASN       |
| rs2123311   | 18:6403286-6403286     | L3MBTL4    |
| rs111987322 | 18:47191759-47191759   | -          |
| rs982983    | 18:52504938-52504938   | DCC        |
| rs28634172  | 18:58822814-58822814   | AC104365.1 |
| rs3891810   | 18:69111089-69111089   | -          |
| rs62091919  | 18:70283206-70283206   | -          |
| rs11883051  | 19:6284444-6284444     | MLLT1      |

|             |                       |            |
|-------------|-----------------------|------------|
| rs12979469  | 19:10619676-10619676  | SLC44A2    |
| rs79277649  | 19:31529094-31529094  | LINC02841  |
| rs6509231   | 19:45655035-45655035  | RN7SL836P  |
| rs4802553   | 19:49089723-49089723  | SNRNP70    |
| rs4801935   | 19:52775042-52775042  | ZNF600     |
| rs59858465  | 19:56401627-56401627  | ZNF583     |
| rs141547530 | 2:3188750-3188750     | EIPR1      |
| rs13387530  | 2:23720859-23720859   | -          |
| rs72780106  | 2:23761964-23761964   | ATAD2B     |
| rs34686340  | 2:24019080-24019080   | MFSD2B     |
| rs56392651  | 2:24032338-24032338   | WDCP       |
| rs4666140   | 2:28926185-28926185   | WDR43      |
| rs10182170  | 2:32479118-32479118   | BIRC6      |
| rs74818005  | 2:33653613-33653613   | AC017050.1 |
| rs139870826 | 2:50817985-50817985   | NRXN1      |
| rs9309337   | 2:61536072-61536072   | XPO1       |
| rs34298249  | 2:62489836-62489836   | RN7SL18P   |
| rs62178016  | 2:62507763-62507763   | TMEM17     |
| rs13416004  | 2:69437844-69437844   | NFU1       |
| rs4852283   | 2:69567218-69567218   | AAK1       |
| rs6734326   | 2:96903998-96903998   | FAM178B    |
| rs144201388 | 2:107997366-107997366 | SLC5A7     |
| rs1219690   | 2:122487007-122487007 | AC011246.1 |
| rs78793148  | 2:136023692-136023692 | DARS-AS1   |
| rs77734975  | 2:144750626-144750626 | TEX41      |
| rs150409445 | 2:145016457-145016457 | TEX41      |
| rs723681    | 2:147910940-147910940 | ACVR2A     |
| rs1965812   | 2:157814786-157814786 | ACVR1      |
| rs4547489   | 2:160302714-160302714 | RBMS1      |
| rs58757862  | 2:160378941-160378941 | RBMS1      |
| rs7572202   | 2:160429040-160429040 | RBMS1      |
| rs353128    | 2:165282098-165282098 | SCN2A      |
| rs6740895   | 2:165283510-165283510 | SCN2A      |
| rs353139    | 2:165289717-165289717 | SCN2A      |
| rs1816918   | 2:165322847-165322847 | SCN2A      |
| rs75629463  | 2:166127885-166127885 | SCN1A      |
| rs7589835   | 2:166216341-166216341 | SCN9A      |
| rs115032219 | 2:166265206-166265206 | SCN9A      |
| rs141858735 | 2:179466193-179466193 | ZNF385B    |
| rs262266    | 2:180012435-180012435 | -          |
| rs58695784  | 2:180057221-180057221 | -          |
| rs13397184  | 2:180961506-180961506 | -          |
| rs4853505   | 2:190382596-190382596 | -          |
| rs3811607   | 2:190435676-190435676 | MFSD6      |
| rs281787    | 2:199919515-199919515 | C2orf69    |
| rs28418905  | 2:208323118-208323118 | PIKFYVE    |

|             |                       |            |
|-------------|-----------------------|------------|
| rs145042764 | 2:208330711-208330711 | PIKFYVE    |
| rs2271543   | 2:218277768-218277768 | PNKD       |
| rs13000510  | 2:222500376-222500376 | SGPP2      |
| rs13010621  | 2:231009411-231009411 | SPATA3     |
| rs6758225   | 2:236030768-236030768 | AGAP1      |
| rs35449298  | 2:236034722-236034722 | AGAP1      |
| rs551859    | 2:238463195-238463195 | -          |
| rs7353549   | 20:793346-793346      | -          |
| rs2295545   | 20:3184040-3184040    | -          |
| rs6037501   | 20:3210559-3210559    | ITPA       |
| rs141459119 | 20:4623150-4623150    | RPS4XP2    |
| rs116158058 | 20:4652752-4652752    | RPS4XP2    |
| rs112864829 | 20:4861106-4861106    | SLC23A2    |
| rs4813918   | 20:10157279-10157279  | SNAP25-AS1 |
| rs11698183  | 20:25994949-25994949  | FAM182A    |
| rs78184009  | 20:31851317-31851317  | DUSP15     |
| rs6119287   | 20:32815400-32815400  | MAPRE1     |
| rs293727    | 20:33345258-33345258  | BPIFB9P    |
| rs6060042   | 20:34773918-34773918  | NCOA6      |
| rs6073118   | 20:43518146-43518146  | L3MBTL1    |
| rs729997    | 20:59411230-59411230  | -          |
| rs1736023   | 21:15440563-15440563  | AJ009632.2 |
| rs12626383  | 21:15462709-15462709  | AJ009632.2 |
| rs1688101   | 21:19347156-19347156  | RNU1-139P  |
| rs8131708   | 21:40047976-40047976  | DSCAM      |
| rs9305690   | 21:40058461-40058461  | DSCAM      |
| rs2837413   | 21:40067182-40067182  | DSCAM      |
| rs10222092  | 21:40082331-40082331  | DSCAM      |
| rs12482422  | 21:40605066-40605066  | DSCAM      |
| rs56379273  | 21:44406603-44406603  | TRPM2      |
| rs5751062   | 22:41202049-41202049  | L3MBTL2    |
| rs9611522   | 22:41231920-41231920  | L3MBTL2    |
| rs7290404   | 22:41353792-41353792  | ZC3H7B     |
| rs74667571  | 22:50348547-50348547  | PPP6R2     |
| rs17046610  | 3:7024398-7024398     | GRM7       |
| rs7652281   | 3:8764054-8764054     | OXTR       |
| rs341839    | 3:21379929-21379929   | -          |
| rs10764     | 3:33496538-33496538   | CLASP2     |
| rs6766294   | 3:33613646-33613646   | CLASP2     |
| rs17075283  | 3:43184728-43184728   | -          |
| rs75228828  | 3:46071391-46071391   | -          |
| rs1982510   | 3:47011447-47011447   | SETD2      |
| rs56273245  | 3:47273006-47273006   | KIF9       |
| rs34365302  | 3:52373396-52373396   | DNAH1      |
| rs613519    | 3:52434924-52434924   | SEMA3G     |
| rs13083798  | 3:52615732-52615732   | PBRM1      |

|             |                       |            |
|-------------|-----------------------|------------|
| rs6765687   | 3:52699090-52699090   | GLT8D1     |
| rs36051354  | 3:52951996-52951996   | SFMBT1     |
| rs2178563   | 3:54791743-54791743   | CACNA2D3   |
| rs114413724 | 3:56515937-56515937   | -          |
| rs28404421  | 3:58306758-58306758   | RPP14      |
| rs13085519  | 3:63650920-63650920   | SNTN       |
| rs139277004 | 3:85818345-85818345   | CADM2      |
| rs4928106   | 3:101044767-101044767 | -          |
| rs62408931  | 3:137110076-137110076 | -          |
| rs79329661  | 3:141569914-141569914 | RASA2      |
| rs7629065   | 3:152412201-152412201 | MBNL1      |
| rs2222275   | 3:155641090-155641090 | PLCH1      |
| rs115083552 | 3:156226229-156226229 | KCNAB1     |
| rs77931272  | 3:167967106-167967106 | -          |
| rs1967027   | 3:176245762-176245762 | -          |
| rs73191724  | 3:187271636-187271636 | MASP1      |
| rs116699996 | 5:28167023-28167023   | -          |
| rs3797237   | 5:54241912-54241912   | ARL15      |
| rs6453214   | 5:76288598-76288598   | SV2C       |
| rs10060273  | 5:80322830-80322830   | SPZ1       |
| rs112216323 | 5:80352963-80352963   | AC026410.3 |
| rs13161403  | 5:88471144-88471144   | AC091826.3 |
| rs60470187  | 5:90756146-90756146   | ADGRV1     |
| rs76801032  | 5:107836324-107836324 | -          |
| rs28786120  | 5:120359407-120359407 | AC113418.1 |
| rs112723361 | 5:120490287-120490287 | PRR16      |
| rs4282308   | 5:124690450-124690450 | ZNF608     |
| rs11241766  | 5:124741569-124741569 | ZNF608     |
| rs6875262   | 5:124774580-124774580 | -          |
| rs1078675   | 5:124881569-124881569 | LINC02240  |
| rs57750646  | 5:132344571-132344571 | SLC22A4    |
| rs13361619  | 5:138312990-138312990 | CDC25C     |
| rs3798153   | 5:138446515-138446515 | REEP2      |
| rs12657476  | 5:151186635-151186635 | CCDC69     |
| rs113516381 | 5:177030476-177030476 | ZNF346     |
| rs3846912   | 6:13656808-13656808   | RANBP9     |
| rs1204148   | 6:13817127-13817127   | MCUR1      |
| rs625964    | 6:20016736-20016736   | -          |
| rs6909187   | 6:25785697-25785697   | SLC17A1    |
| rs62396221  | 6:26285520-26285520   | H4C8       |
| rs9378107   | 6:28793906-28793906   | -          |
| rs1265075   | 6:31145336-31145336   | CCHCR1     |
| rs9263850   | 6:31188411-31188411   | -          |
| rs28397271  | 6:31196866-31196866   | HCG27      |
| rs6930643   | 6:31206258-31206258   | HCG27      |
| rs28744244  | 6:31209999-31209999   | -          |



|             |                       |            |
|-------------|-----------------------|------------|
| rs2853923   | 6:31297960-31297960   | LINC02571  |
| rs6909636   | 6:31378822-31378822   | ZDHHC20P2  |
| rs3130062   | 6:31558135-31558135   | NFKBIL1    |
| rs2857609   | 6:31610048-31610048   | UQCRHP1    |
| rs1442222   | 6:46246324-46246324   | RCAN2      |
| rs9389810   | 6:99881570-99881570   | -          |
| rs36142021  | 6:118838319-118838319 | MCM9       |
| rs12206988  | 6:119085363-119085363 | FAM184A    |
| rs6569038   | 6:119095307-119095307 | FAM184A    |
| rs7769687   | 6:125912545-125912545 | NCOA7      |
| rs12662170  | 6:150925255-150925255 | MTHFD1L    |
| rs9365002   | 6:158903689-158903689 | C6orf99    |
| rs77846331  | 6:159910464-159910464 | MAS1       |
| rs7744123   | 6:168219979-168219979 | AL606970.5 |
| rs73047368  | 7:2726762-2726762     | GNA12      |
| rs78391336  | 7:2793074-2793074     | GNA12      |
| rs113918424 | 7:6333933-6333933     | FAM220A    |
| rs61247228  | 7:6612156-6612156     | C7orf26    |
| rs12702597  | 7:7272864-7272864     | AC005532.1 |
| rs140622649 | 7:36358639-36358639   | KIAA0895   |
| rs78241966  | 7:36446251-36446251   | ANLN       |
| rs41279603  | 7:43943193-43943193   | UBE2D4     |
| rs62469301  | 7:65202049-65202049   | INTS4P1    |
| rs1075007   | 7:78481252-78481252   | MAGI2      |
| rs62461391  | 7:82854172-82854172   | PCLO       |
| rs76083843  | 7:89304380-89304380   | ZNF804B    |
| rs10215799  | 7:94675032-94675032   | -          |
| rs17166875  | 7:95411959-95411959   | PON2       |
| rs2237585   | 7:95420506-95420506   | PON2       |
| rs4595055   | 7:95707291-95707291   | -          |
| rs6979335   | 7:100492237-100492237 | NYAP1      |
| rs7805498   | 7:100537297-100537297 | AGFG2      |
| rs4599742   | 7:106050650-106050650 | -          |
| rs76305012  | 7:117557301-117557301 | CFTR       |
| rs79006095  | 7:120333784-120333784 | KCND2      |
| rs73166011  | 7:149436878-149436878 | ZNF777     |
| rs1971411   | 8:8415897-8415897     | AC103957.1 |
| rs2921073   | 8:8450133-8450133     | -          |
| rs1532278   | 8:27608798-27608798   | CLU        |
| rs7837112   | 8:28907976-28907976   | HMBBOX1    |
| rs7011522   | 8:35029242-35029242   | -          |
| rs118027082 | 8:73952340-73952340   | ELOC       |
| rs117582595 | 8:104624038-104624038 | ZFPM2      |
| rs12541194  | 8:104637830-104637830 | ZFPM2      |
| rs6469271   | 8:109632545-109632545 | SYBU       |
| rs800902    | 8:115416489-115416489 | TRPS1      |

|             |                       |            |
|-------------|-----------------------|------------|
| rs73337990  | 8:124422412-124422412 | -          |
| rs17372350  | 8:124576693-124576693 | MTSS1      |
| rs3857948   | 8:124598539-124598539 | MTSS1      |
| rs75393804  | 8:134506857-134506857 | ZFAT       |
| rs75582926  | 8:134523293-134523293 | ZFAT       |
| rs1060832   | 8:140531789-140531789 | AGO2       |
| rs149865921 | 8:141499890-141499890 | MROH5      |
| rs117511259 | 9:4064097-4064097     | GLIS3      |
| rs78062691  | 9:32257417-32257417   | -          |
| rs76639411  | 9:80868137-80868137   | AL138749.1 |
| rs2025943   | 9:89153960-89153960   | SHC3       |
| rs7862334   | 9:90493810-90493810   | LINC01501  |
| rs10821079  | 9:93161958-93161958   | -          |
| rs13289468  | 9:125418053-125418053 | AL627223.2 |
| rs13283793  | 9:125679362-125679362 | MAPKAP1    |
| rs113253813 | 9:127498834-127498834 | LRSAM1     |

**Supplementary table 5: Counts of incident PD cases and controls within each decile of the PRS in the testing (validation) cohort.**

| Decile<br>(1=lowest<br>risk, 10=<br>highest risk) | Controls | Cases | Case prevalence within decile |
|---------------------------------------------------|----------|-------|-------------------------------|
| 1                                                 | 21651    | 28    | 0.001291572                   |
| 2                                                 | 21635    | 38    | 0.001753334                   |
| 3                                                 | 21616    | 52    | 0.002399852                   |
| 4                                                 | 21623    | 51    | 0.00235305                    |
| 5                                                 | 21604    | 57    | 0.002631457                   |
| 6                                                 | 21612    | 53    | 0.002446342                   |
| 7                                                 | 21598    | 59    | 0.002724292                   |
| 8                                                 | 21588    | 57    | 0.002633403                   |
| 9                                                 | 21559    | 74    | 0.0034207                     |
| 10                                                | 21543    | 82    | 0.003791908                   |

**Supplementary table 6: Reproduced with permission from Nalls et al 2019. PD risk loci from the Meta5 GWAS. Columns show RSID and nearest genes. To determine how much variance explained by the PRS was due to previously undiscovered loci, all variants within 1MB of these loci were excluded.**

| SNP         | Nearest Gene     |
|-------------|------------------|
| rs114138760 | PMVK             |
| rs35749011  | KRTCAP2          |
| rs76763715  | GBAP1            |
| rs6658353   | FCGR2A           |
| rs11578699  | VAMP4            |
| rs823118    | NUCKS1           |
| rs11557080  | RAB29            |
| rs4653767   | ITPKB            |
| rs10797576  | SIPA1L2          |
| rs76116224  | KCNS3            |
| rs2042477   | KCNIP3           |
| rs11683001  | MAP4K4           |
| rs57891859  | TMEM163          |
| rs1474055   | STK39            |
| rs73038319  | SATB1            |
| rs6808178   | LINC00693        |
| rs12497850  | IP6K2            |
| rs55961674  | KPNA1            |
| rs11707416  | MED12L           |
| rs1450522   | SPTSSB           |
| rs10513789  | MCCC1            |
| rs873786    | GAK              |
| rs34311866  | TMEM175          |
| rs4698412   | BST1             |
| rs34025766  | LCORL            |
| rs6825004   | SCARB2           |
| rs4101061   | FAM47E           |
| rs6854006   | FAM47E-<br>STBD1 |
| rs356182    | SNCA             |
| rs5019538   | SNCA             |
| rs13117519  | CAMK2D           |
| rs62333164  | CLCN3            |
| rs1867598   | ELOVL7           |
| rs26431     | PAM              |
| rs11950533  | C5orf24          |
| rs4140646   | LOC100131289     |
| rs9261484   | TRIM40           |
| rs112485576 | HLA-DRB5         |

|             |              |
|-------------|--------------|
| rs12528068  | RIMS1        |
| rs997368    | FYN          |
| rs75859381  | RPS12        |
| rs199351    | GPNMB        |
| rs76949143  | GS1-124K5.11 |
| rs1293298   | CTSB         |
| rs620513    | FGF20        |
| rs2280104   | BIN3         |
| rs2086641   | FAM49B       |
| rs13294100  | SH3GL2       |
| rs10756907  | SH3GL2       |
| rs6476434   | UBAP2        |
| rs896435    | ITGA8        |
| rs10748818  | GBF1         |
| rs72840788  | BAG3         |
| rs117896735 | INPP5F       |
| rs7938782   | RNF141       |
| rs12283611  | DLG2         |
| rs3802920   | IGSF9B       |
| rs76904798  | LRRK2        |
| rs34637584  | LRRK2        |
| rs7134559   | SCAF11       |
| rs10847864  | HIP1R        |
| rs11610045  | FBRSL1       |
| rs9568188   | CAB39L       |
| rs4771268   | MBNL2        |
| rs12147950  | MIPOL1       |
| rs11158026  | GCH1         |
| rs3742785   | RPS6KL1      |
| rs979812    | GALC         |
| rs2251086   | VPS13C       |
| rs6497339   | SYT17        |
| rs2904880   | CD19         |
| rs11150601  | SETD1A       |
| rs6500328   | NOD2         |
| rs3104783   | CASC16       |
| rs10221156  | CHD9         |
| rs12600861  | CHRNA1       |
| rs12951632  | RETREG3      |
| rs2269906   | UBTF         |
| rs850738    | FAM171A2     |
| rs62053943  | CRHR1        |

|             |        |
|-------------|--------|
| rs117615688 | CRHR1  |
| rs11658976  | WNT3   |
| rs61169879  | BRIP1  |
| rs666463    | DNAH17 |
| rs1941685   | ASXL3  |
| rs12456492  | RIT2   |
| rs8087969   | MEX3C  |
| rs55818311  | SPPL2B |
| rs77351827  | CRLS1  |
| rs2248244   | DYRK1A |

**Supplementary table 7: multiplicative interaction term betas and associated P values for traits associated with PD x polygenic risk score. Interaction terms are derived from logistic regression models of the form PD status ~ Age + Sex + first four genetic PCs + risk factor + PRS + PRS x risk factor. P values are derived from likelihood ratio tests. The estimate for menarche is derived from a model without a sex term as it was restricted to females.**

| Exposure            | Beta         | P.value     | FDR         |
|---------------------|--------------|-------------|-------------|
| Diabetes            | -0.403295781 | 0.026329263 | 0.263292625 |
| PD FHx              | 0.200189481  | 0.173728893 | 0.424421204 |
| Sleepiness          | -0.130869523 | 0.151841837 | 0.424421204 |
| Dementia FHx status | -0.138276444 | 0.212210602 | 0.424421204 |
| Menarche            | 0.060885645  | 0.184540506 | 0.424421204 |
| Epilepsy            | -0.27737041  | 0.305717602 | 0.509529336 |
| Depression          | -0.108061776 | 0.483702106 | 0.642356797 |
| Smoking status      | 0.047715657  | 0.578121118 | 0.642356797 |
| Gastric Ulcer       | -0.156191177 | 0.557395514 | 0.642356797 |
| Alcohol             | 0.022188797  | 0.808528932 | 0.808528932 |
